# Supplementary material for: Structural characterisation of chromatin remodelling intermediates supports linker DNA-dependent product inhibition as a mechanism for nucleosome spacing
Source: eLife journal article supplement (doi:10.7554/elife.52513), 2025-12-24

# Bottom strand Cy3

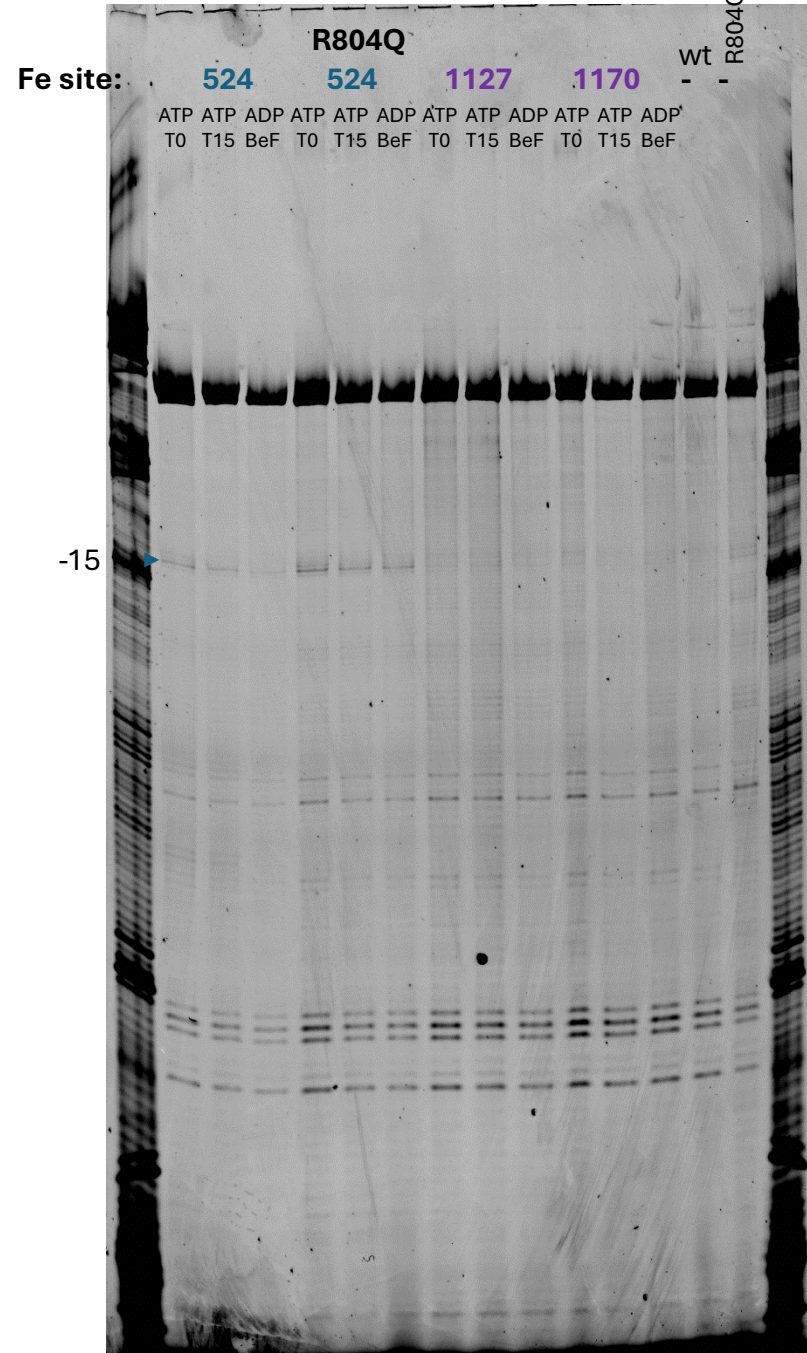

# Top strand Cy5

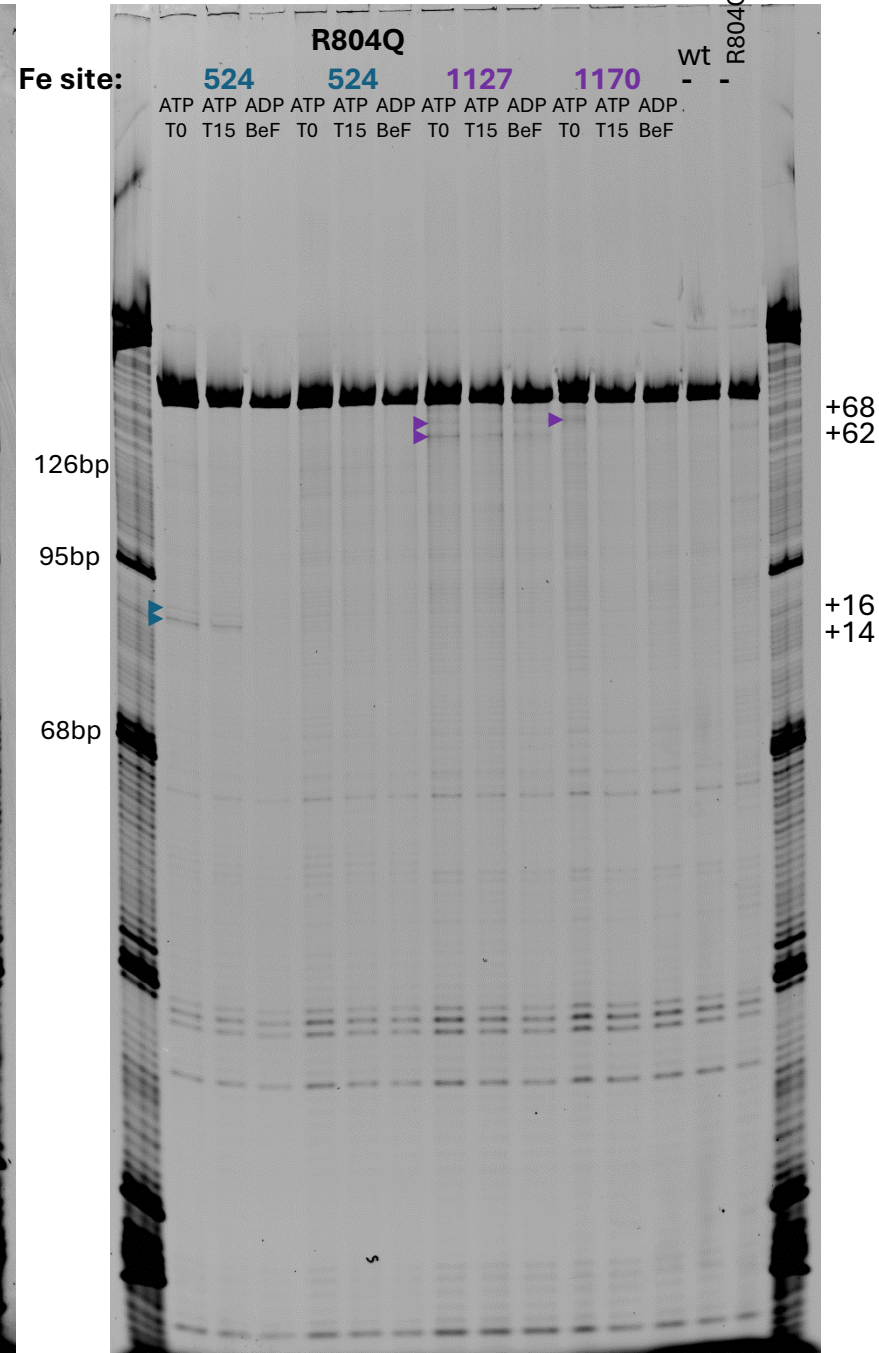

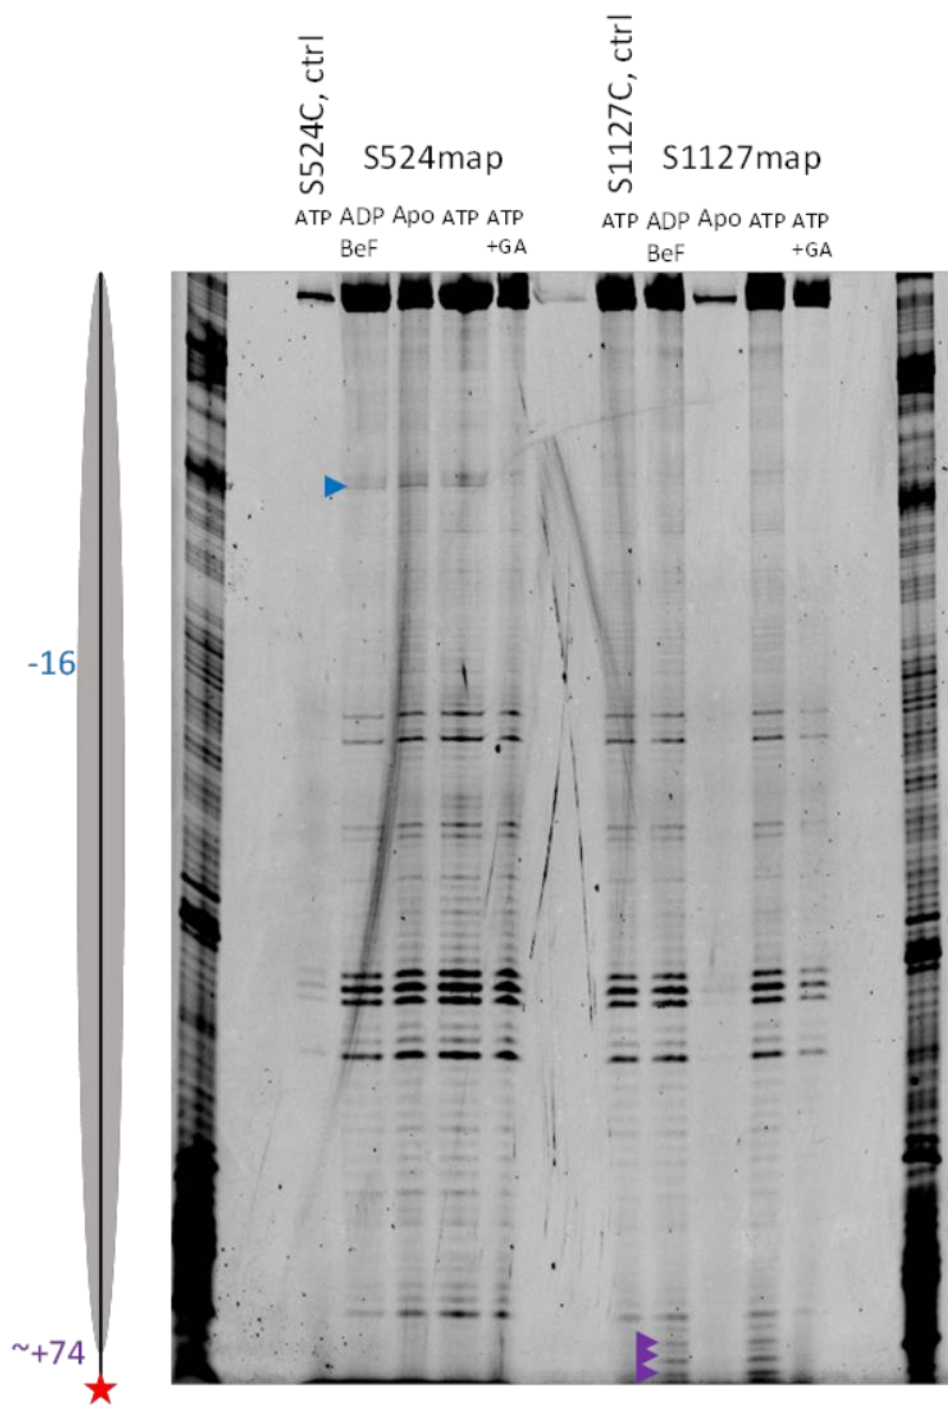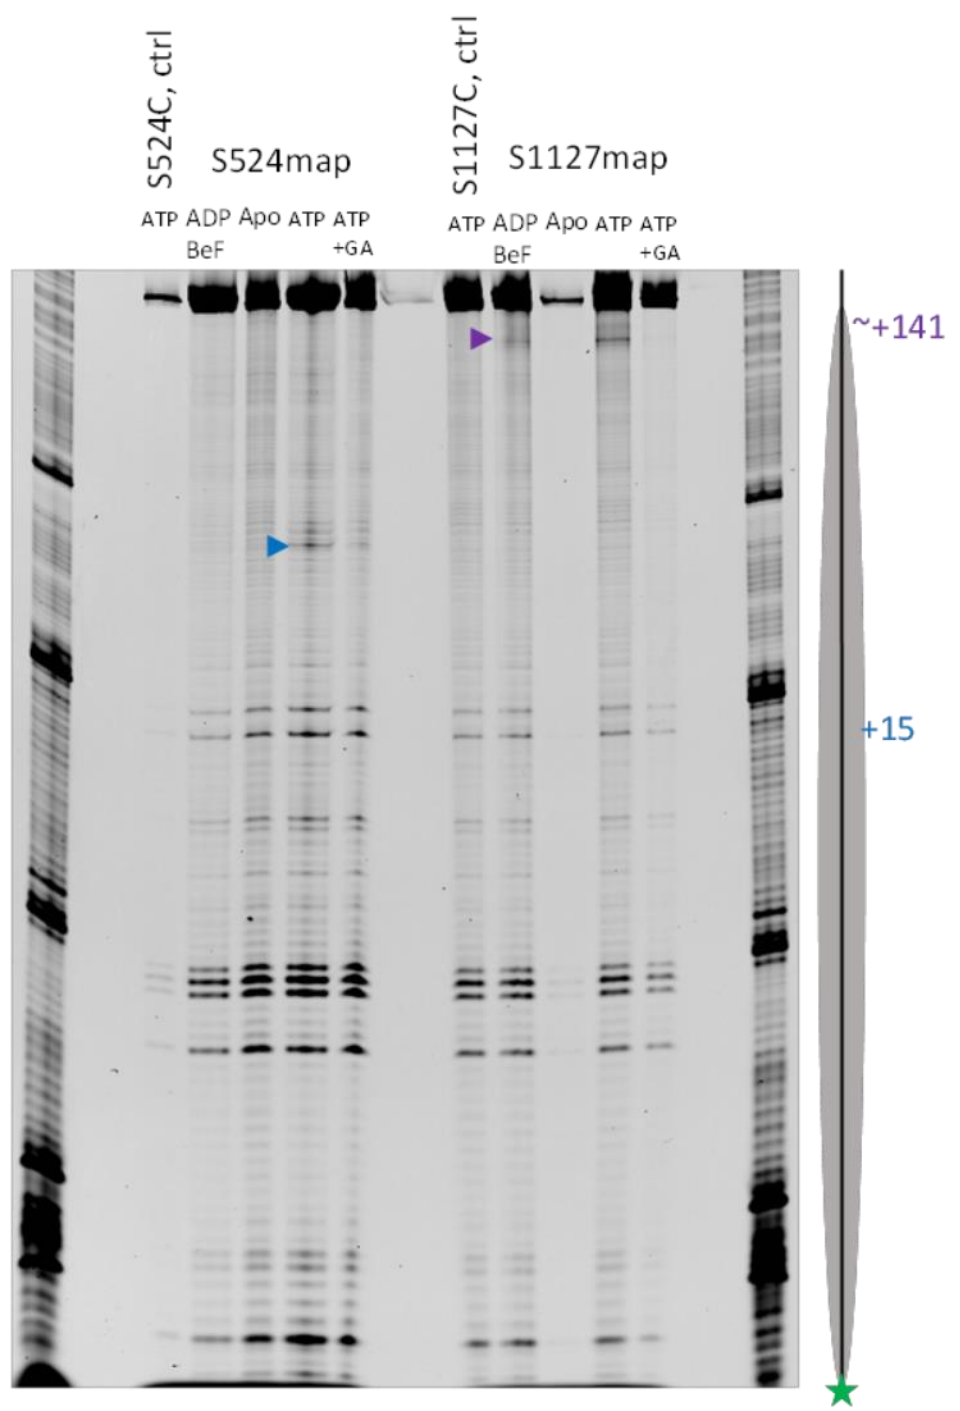

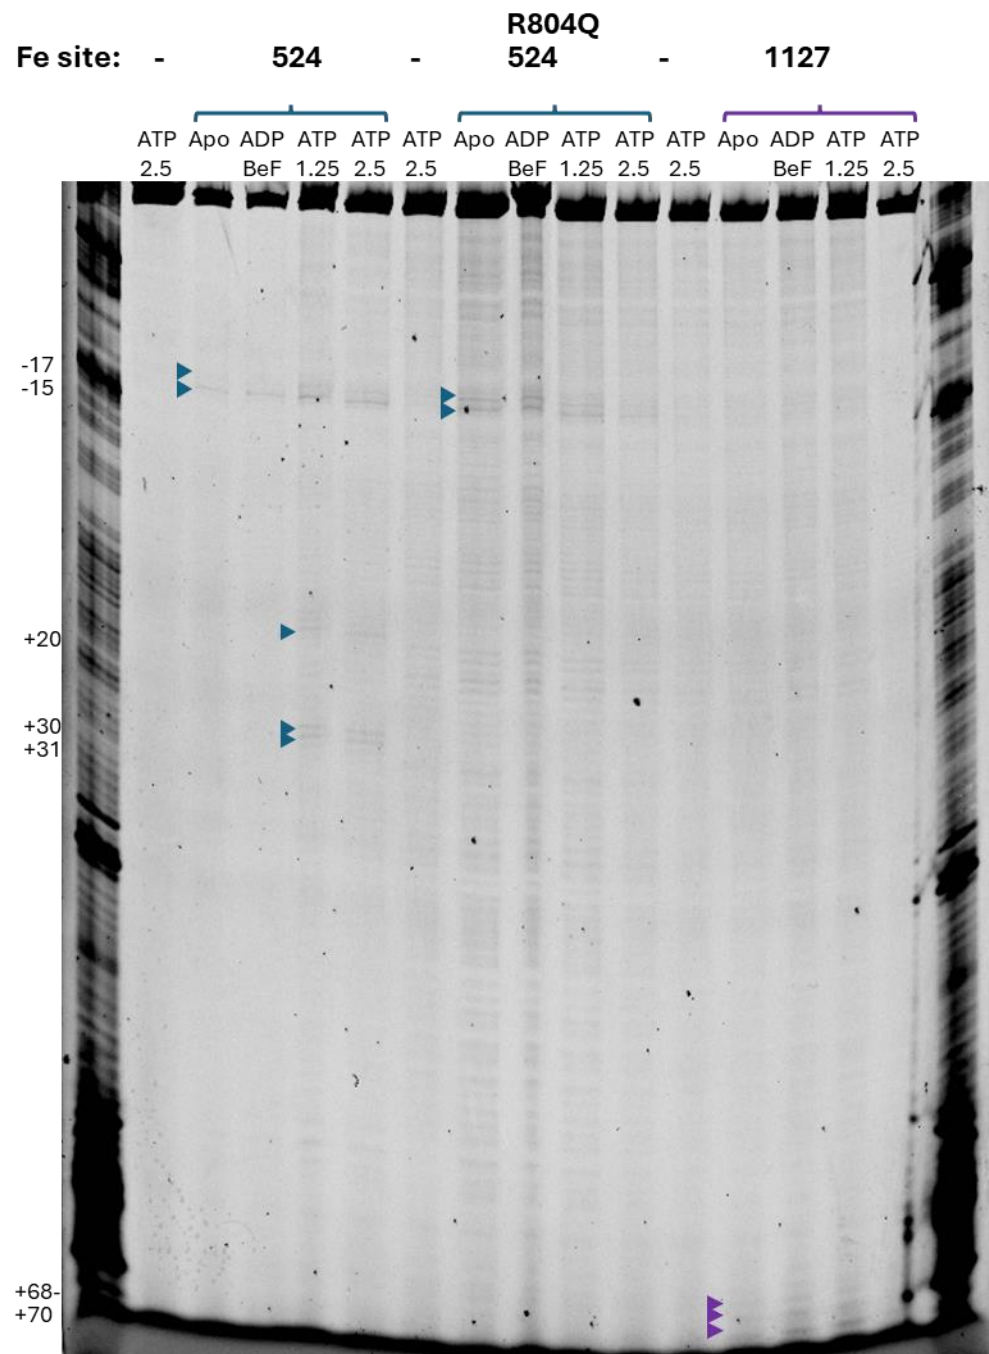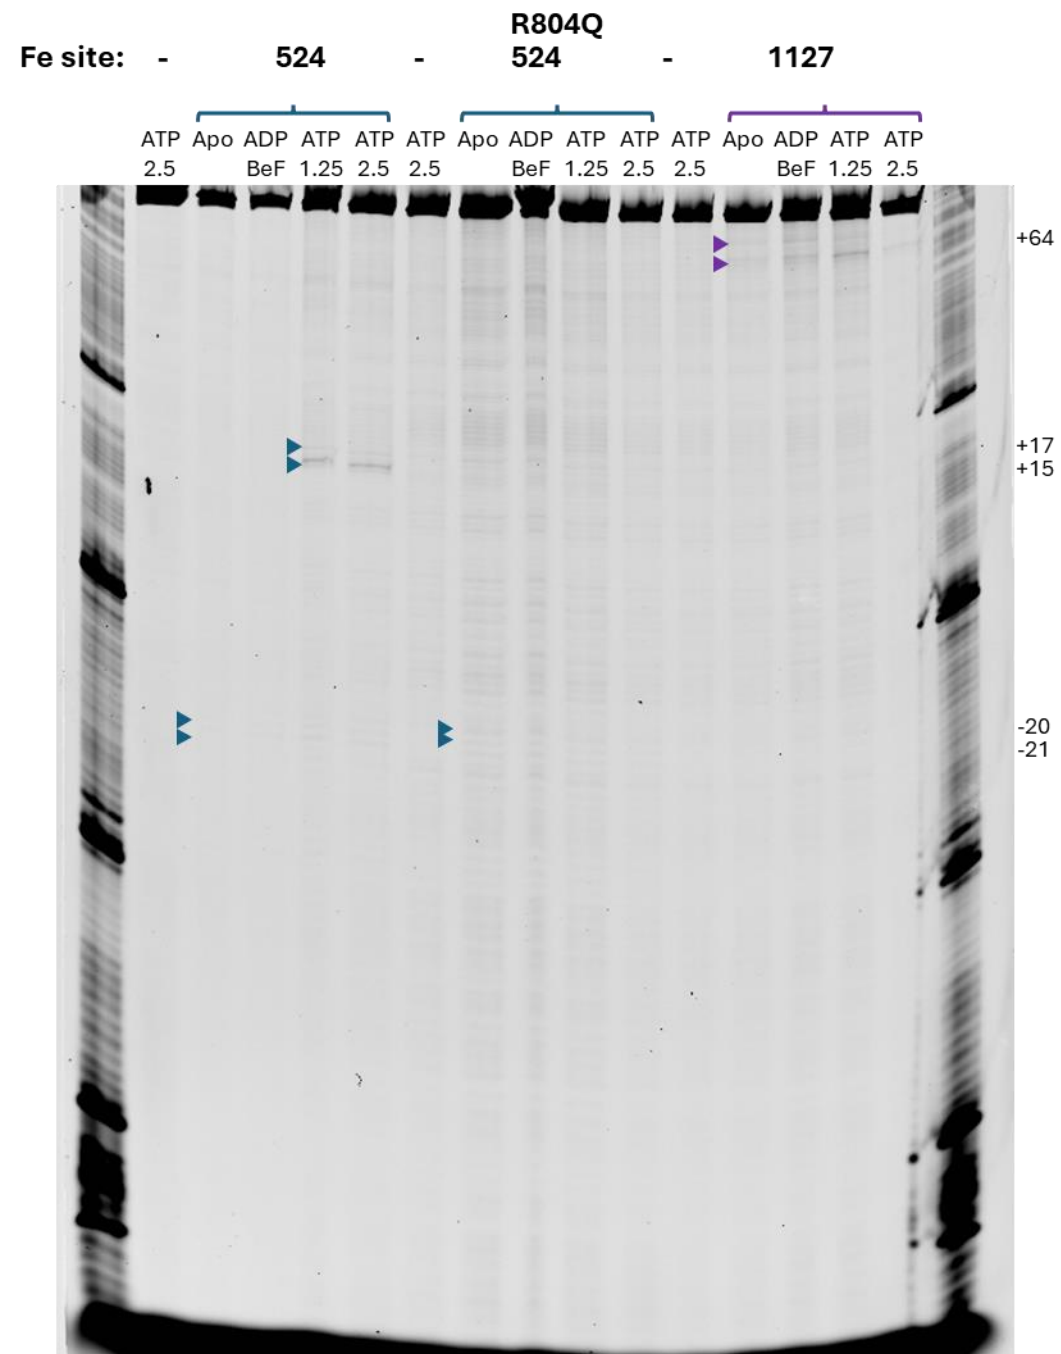



158 bp bottom strand Cy3

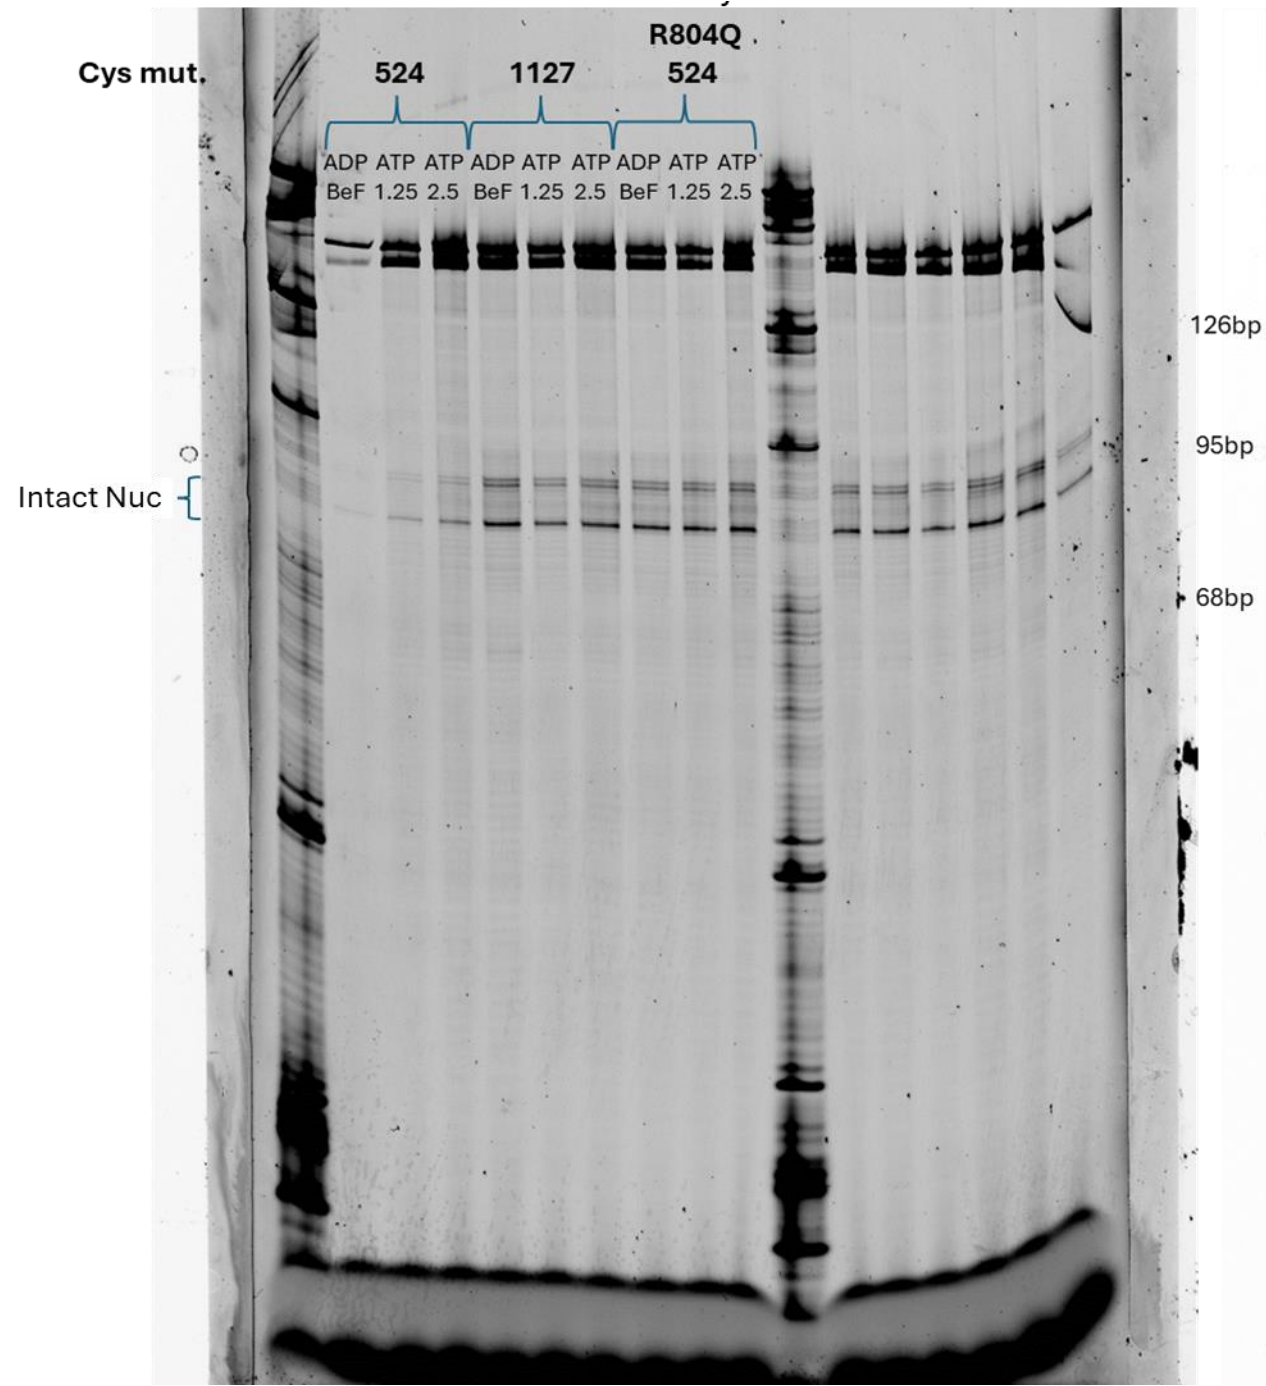

158 bp top strand Cy5

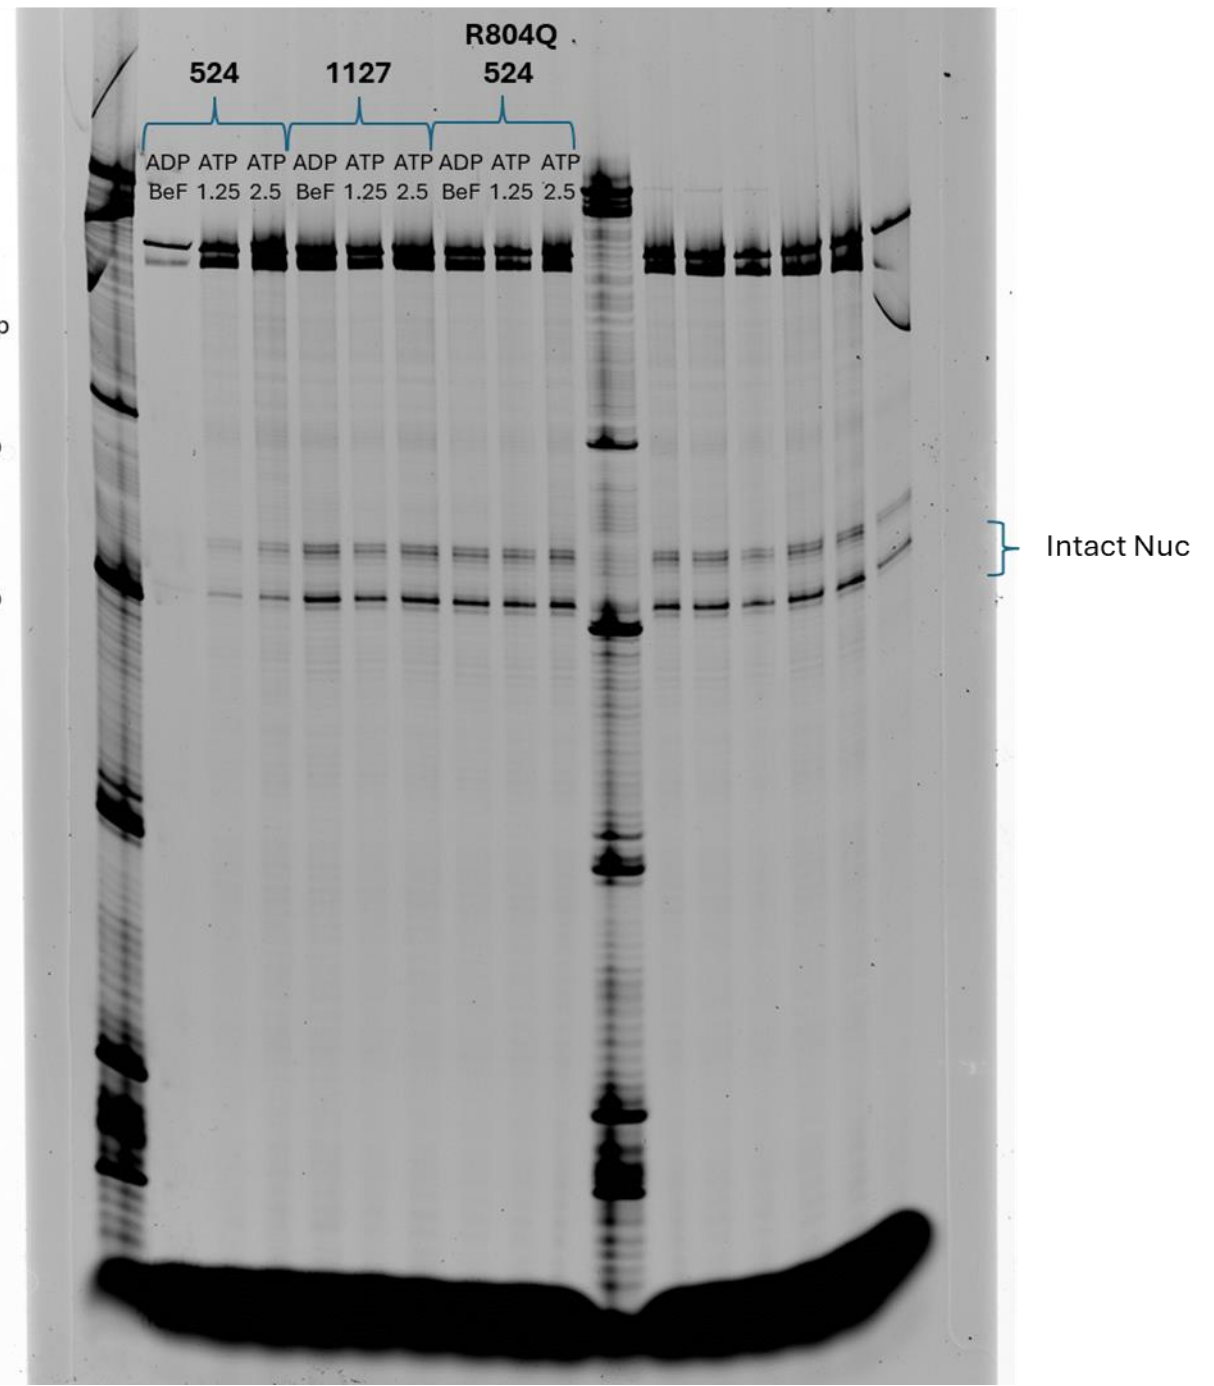

194 bp Top strand Cy3

| Fe site:        | - | 524 |   |   |   | 1127 |   |   |   |
|-----------------|---|-----|---|---|---|------|---|---|---|
| ATP(10uM):      | + | +   | + | + | + | +    | + | + | + |
| ADP-BeF(1.5uM): | - | -   | - | - | - | -    | - | - | - |
| Time (30C):     | 0 | 2   | 8 | 0 | 2 | 2    | 8 | 8 | 0 |
| Mapping:        | + | +   | + | + | - | +    | - | + | + |

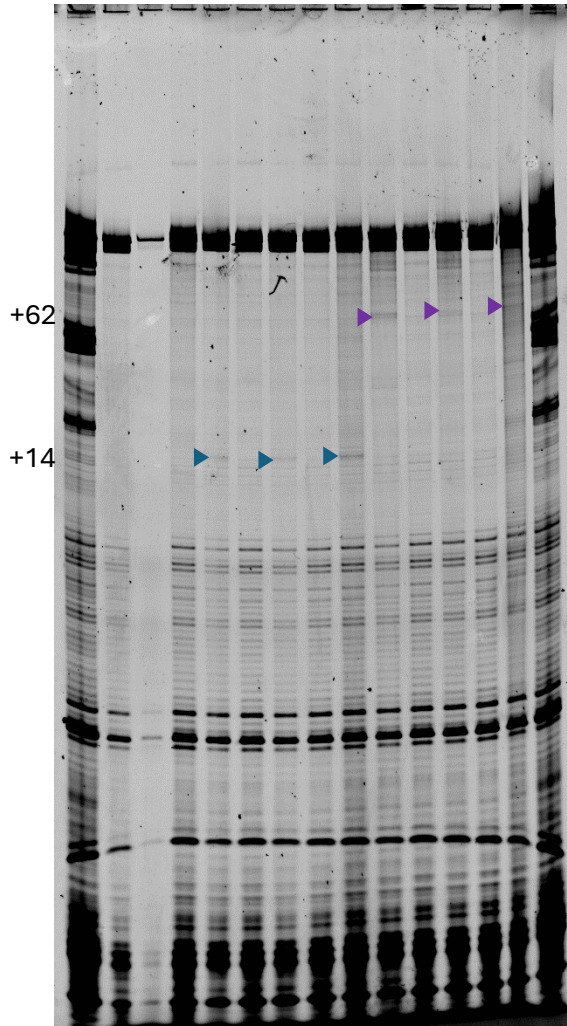

194 bp bottom strand cy5

|  | - | 524 |   |   |   | 1127 |   |   |   |
|--|---|-----|---|---|---|------|---|---|---|
|  | + | +   | + | + | + | +    | + | + | + |
|  | - | -   | - | - | - | -    | - | - | - |
|  | 0 | 2   | 8 | 0 | 2 | 2    | 8 | 8 | 0 |
|  | + | +   | + | + | - | +    | - | + | + |

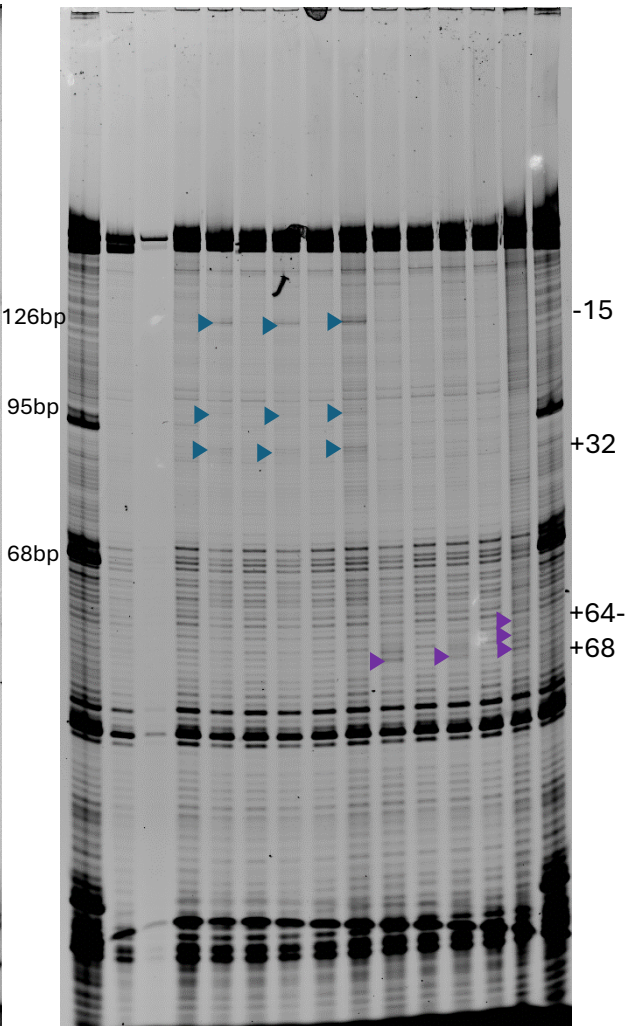

194 bp Top strand Cy3

|  | - | 524 | 1127 |
|--|---|-----|------|
|  | - | -   | -    |
|  | + | +   | +    |
|  | 0 | 0   | 0    |
|  | + | -   | +    |

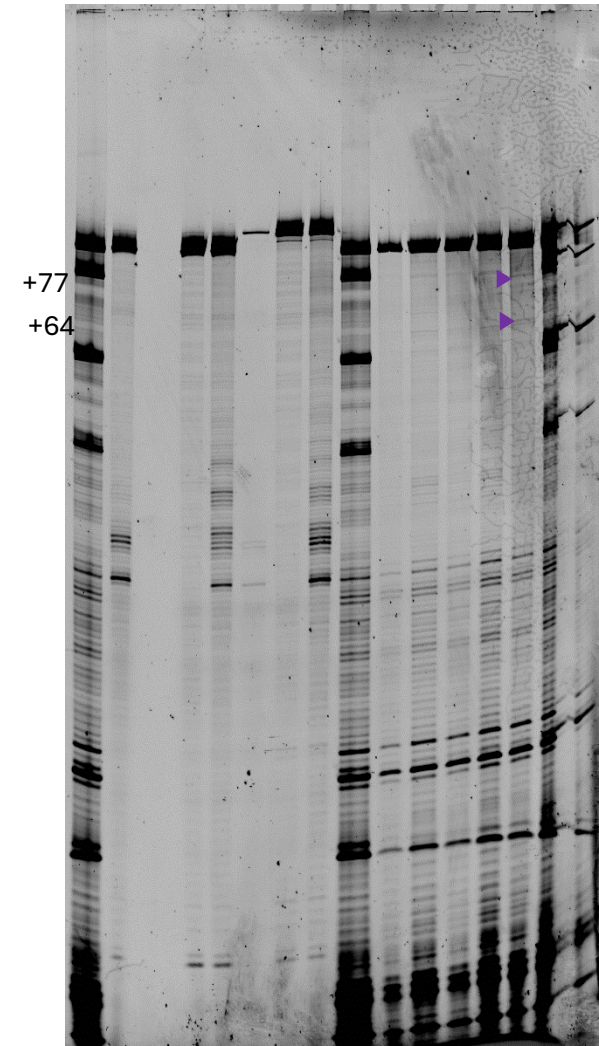

194 bp bottom strand cy5

|  | - | 524 | 1127 |
|--|---|-----|------|
|  | - | -   | -    |
|  | + | +   | +    |
|  | 0 | 0   | 0    |
|  | + | -   | +    |

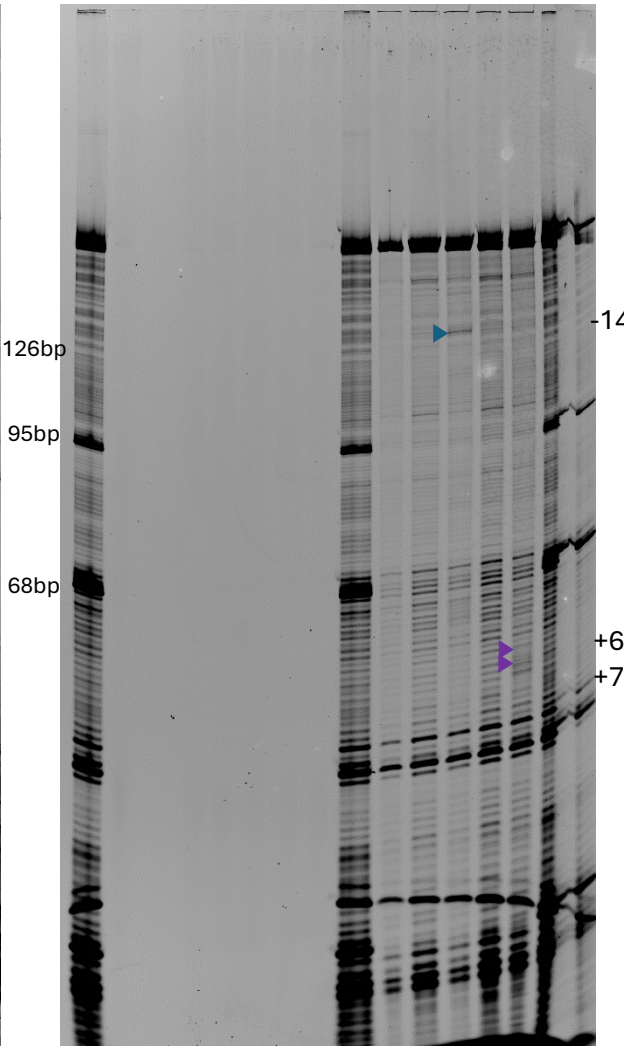

\*1127 had R834Q mutation, as well as S221C



194 bp Top strand Cy3

| Fe site: | 1127 | -  | - | -  | 524 | 1127 | 1127 |    |    |    |    |   |   |    |    |
|----------|------|----|---|----|-----|------|------|----|----|----|----|---|---|----|----|
| Time:    | 10   | 10 | 0 | 10 | 20  | 0    | 0    | 10 | 10 | 20 | 20 | 0 | 0 | 20 | 20 |
| Mapping: | -    | +  | + | +  | +   | -    | +    | -  | +  | -  | +  | - | + | -  | +  |

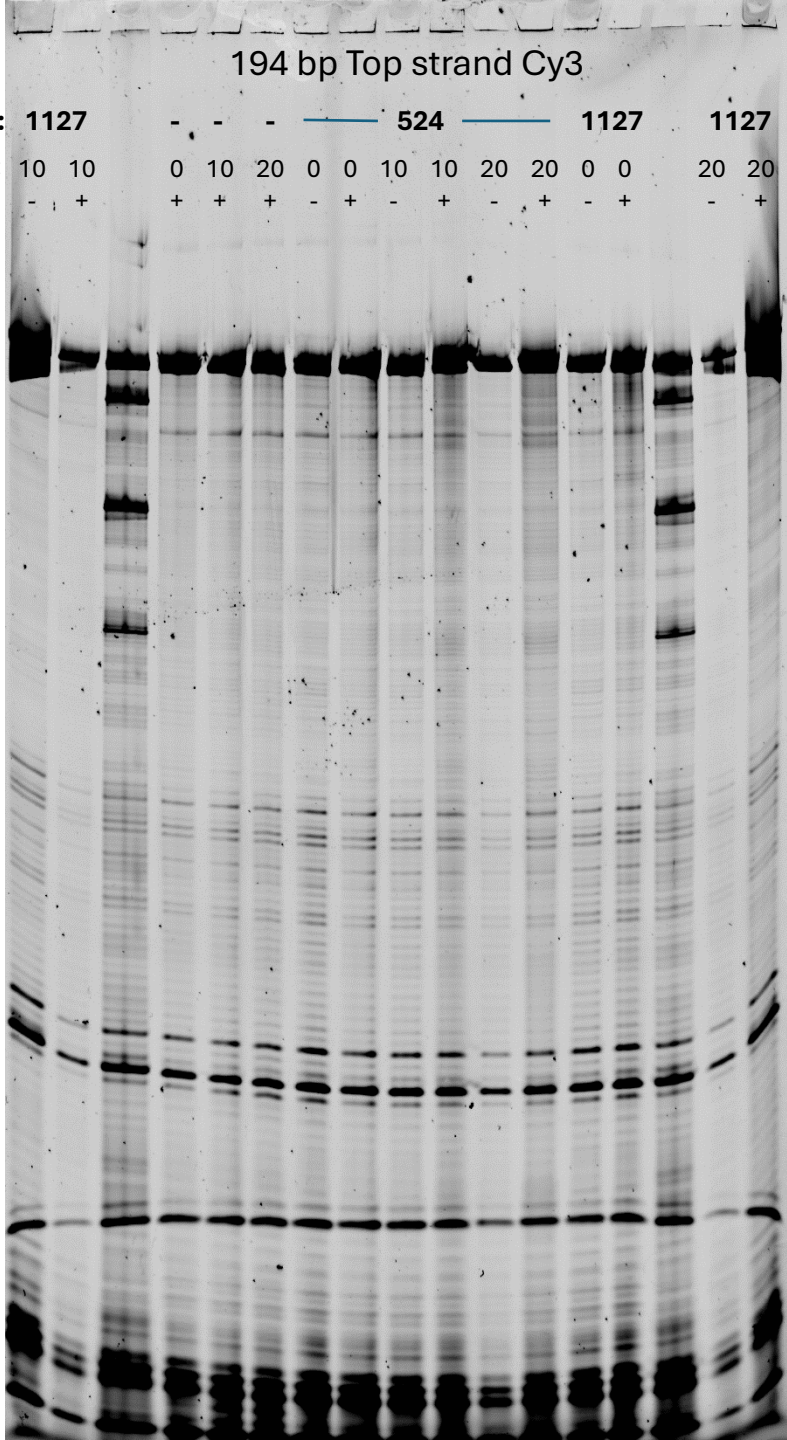

194 bp bottom strand cy5

| 1127 | -  | - | -  | 524 | 1127 | 1127 |    |    |    |    |   |   |    |    |
|------|----|---|----|-----|------|------|----|----|----|----|---|---|----|----|
| 10   | 10 | 0 | 10 | 20  | 0    | 0    | 10 | 10 | 20 | 20 | 0 | 0 | 20 | 20 |
| -    | +  | + | +  | +   | -    | +    | -  | +  | -  | +  | - | + | -  | +  |

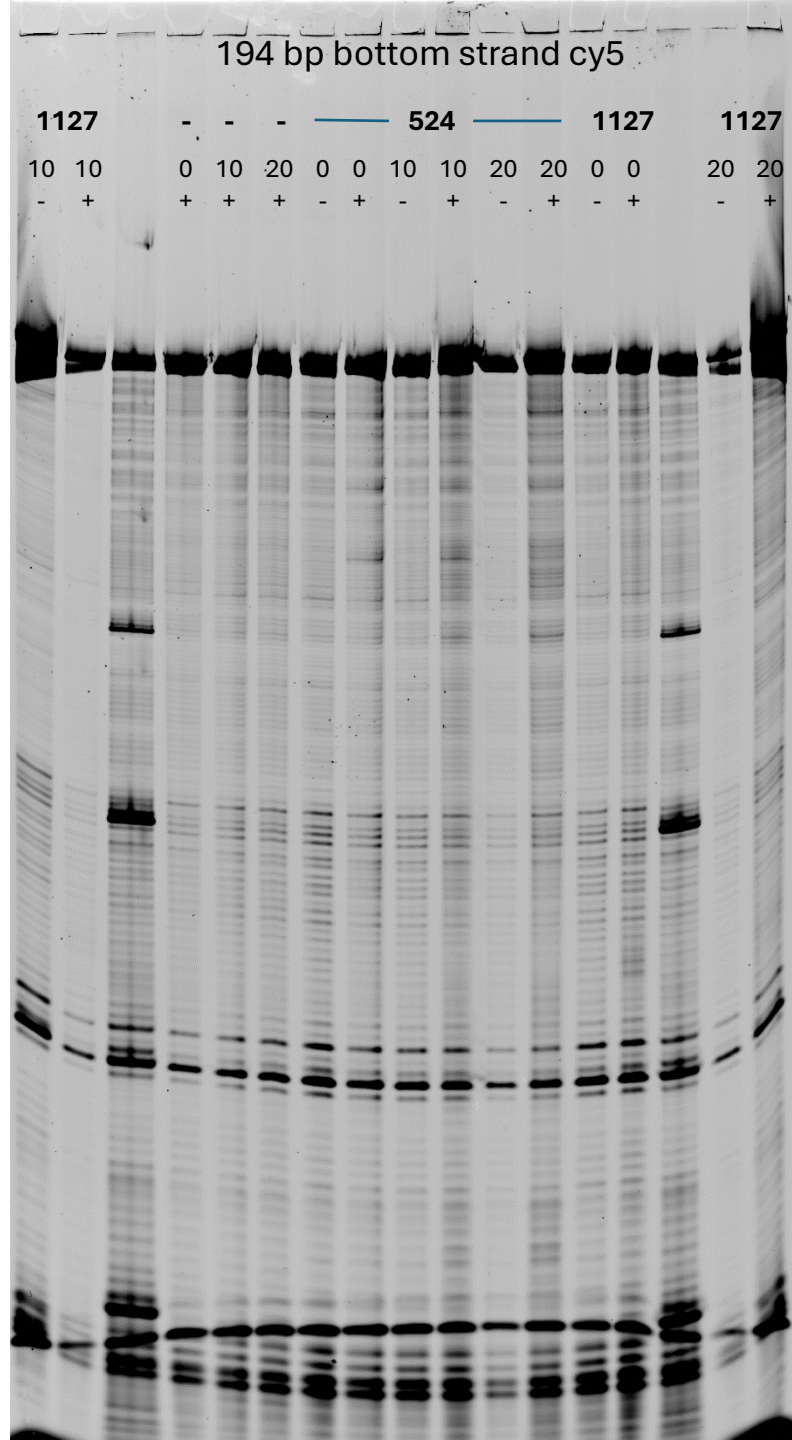

\*1127 had R834Q mutation,  
as well as S221C



194 bp Top strand Cy3

| Fe site:        | 524 |    |   | R804Q |    |   | 1127 |    |   | 1170 |    |   | - | - |
|-----------------|-----|----|---|-------|----|---|------|----|---|------|----|---|---|---|
| ATP(2.5uM):     | +   | +  | - | +     | +  | - | +    | +  | - | +    | +  | - |   |   |
| ADP-BeF(1.5uM): | -   | -  | + | -     | -  | + | -    | -  | + | -    | -  | + |   |   |
| Time (30C):     | 0   | 15 | 0 | 0     | 15 | 0 | 0    | 15 | 0 | 0    | 15 | 0 |   |   |

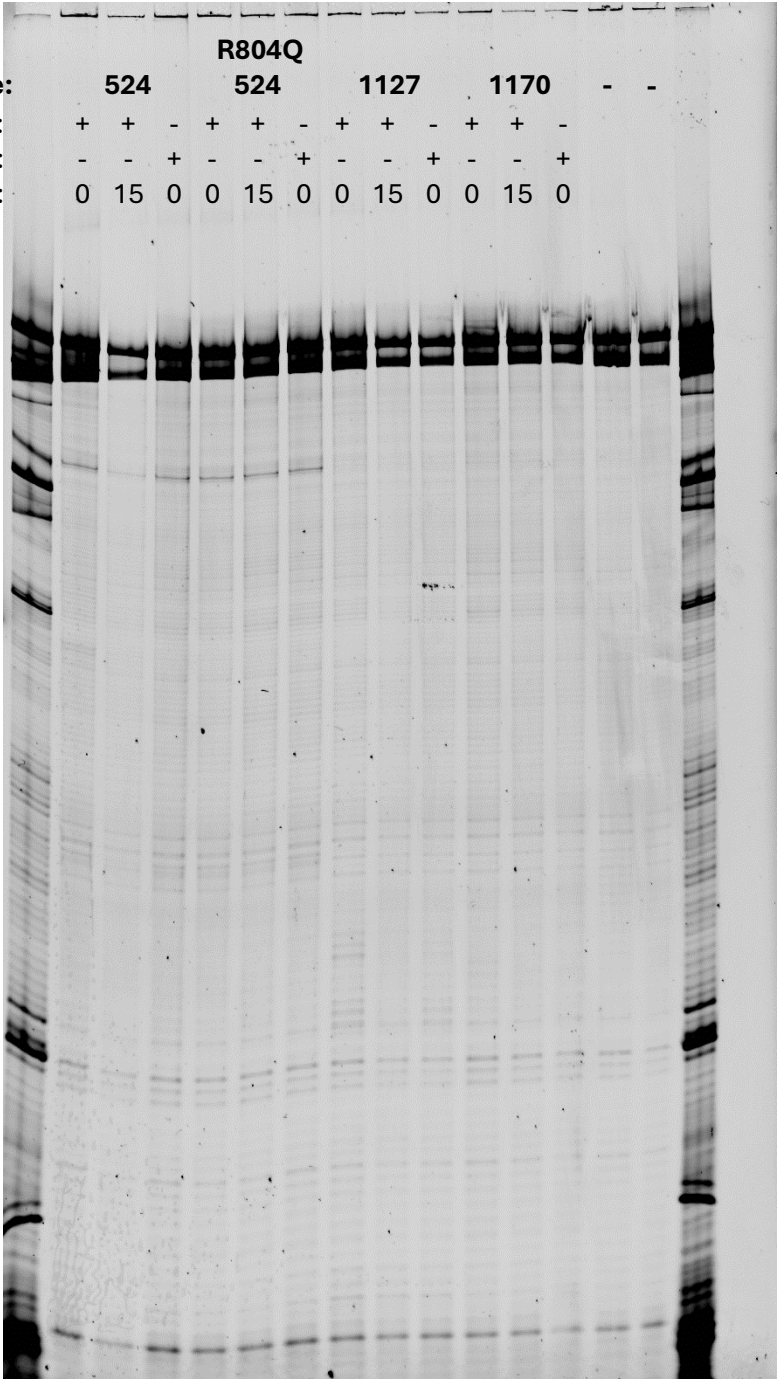

194 bp bottom strand cy5

|                 | 524 |    |   | R804Q |    |   | 1127 |    |   | 1170 |    |   | - | - |
|-----------------|-----|----|---|-------|----|---|------|----|---|------|----|---|---|---|
| ATP(2.5uM):     | +   | +  | - | +     | +  | - | +    | +  | - | +    | +  | - |   |   |
| ADP-BeF(1.5uM): | -   | -  | + | -     | -  | + | -    | -  | + | -    | -  | + |   |   |
| Time (30C):     | 0   | 15 | 0 | 0     | 15 | 0 | 0    | 15 | 0 | 0    | 15 | 0 |   |   |

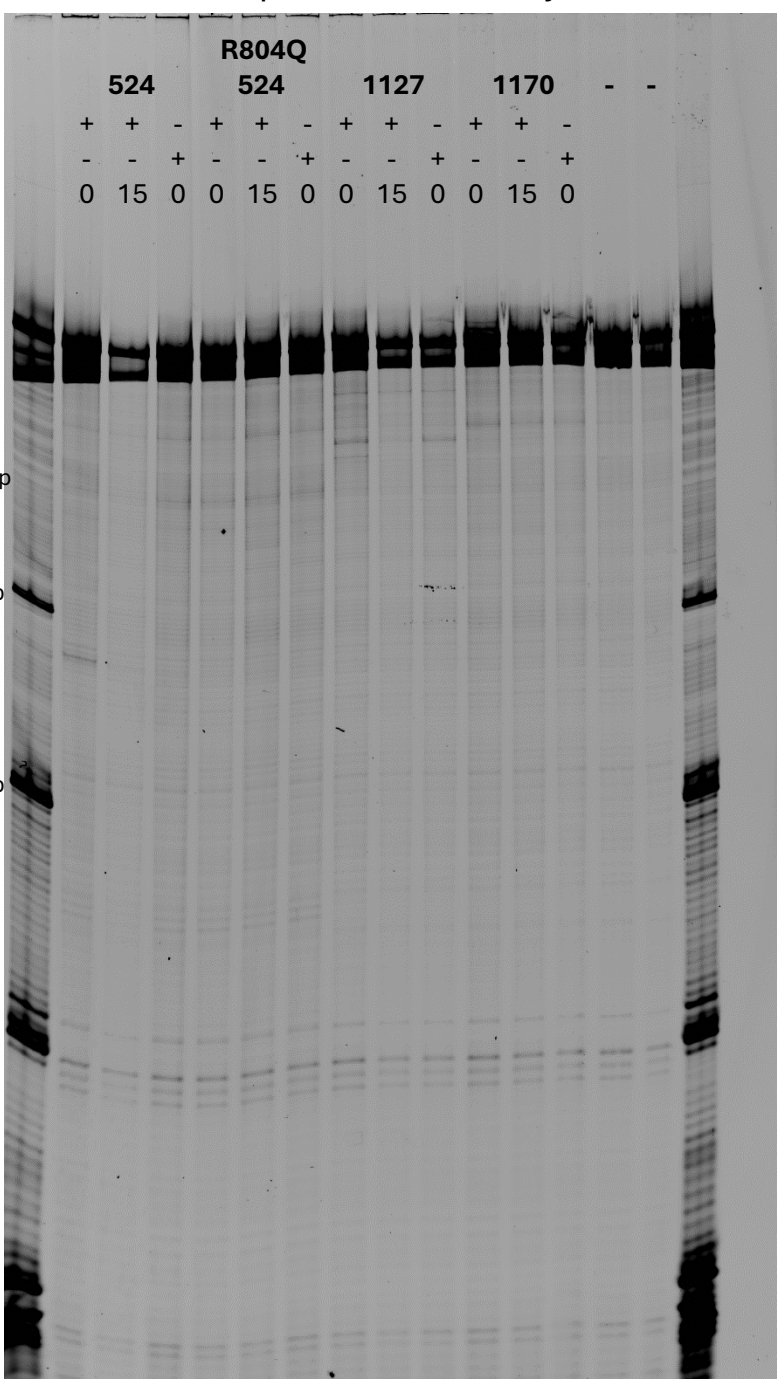

126bp

95bp

68bp



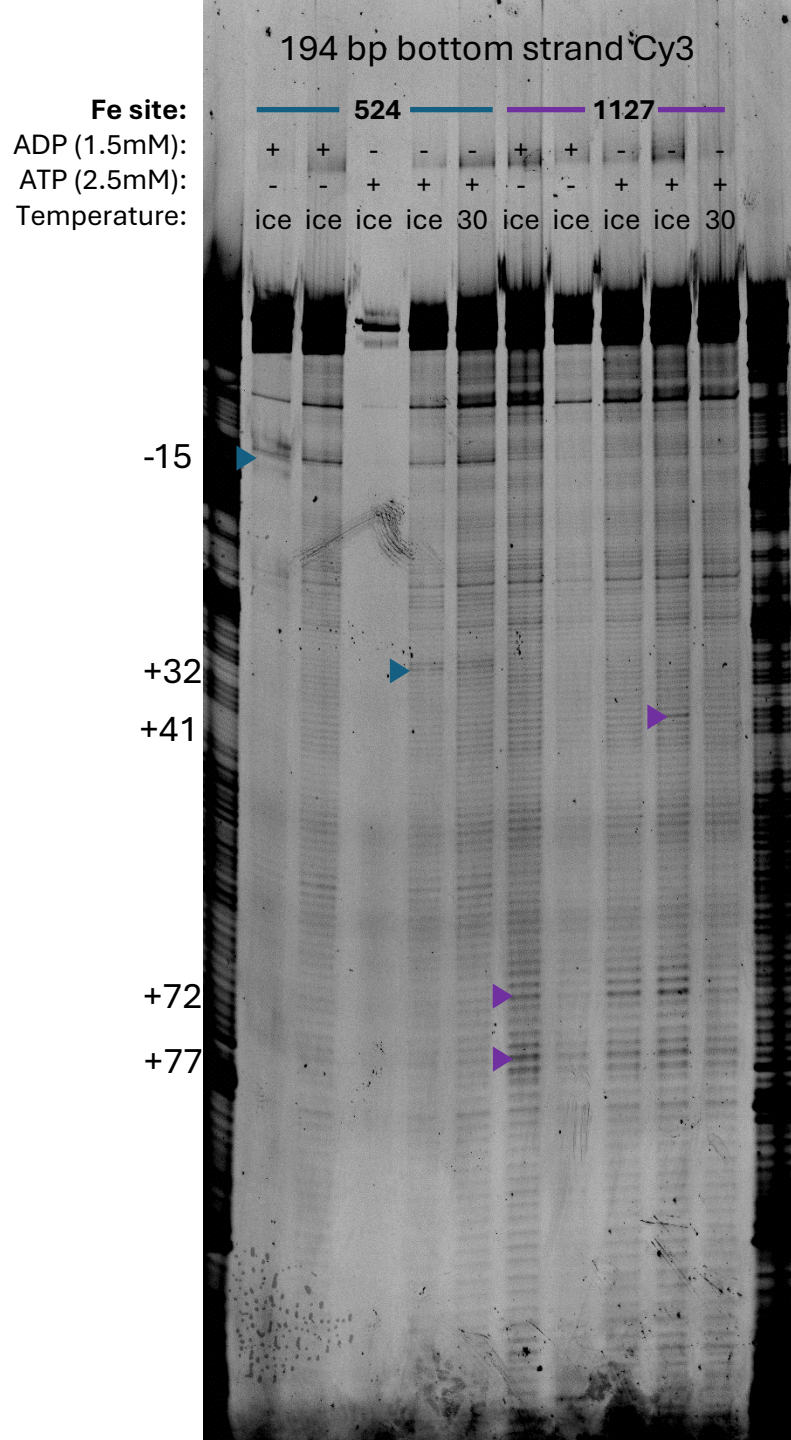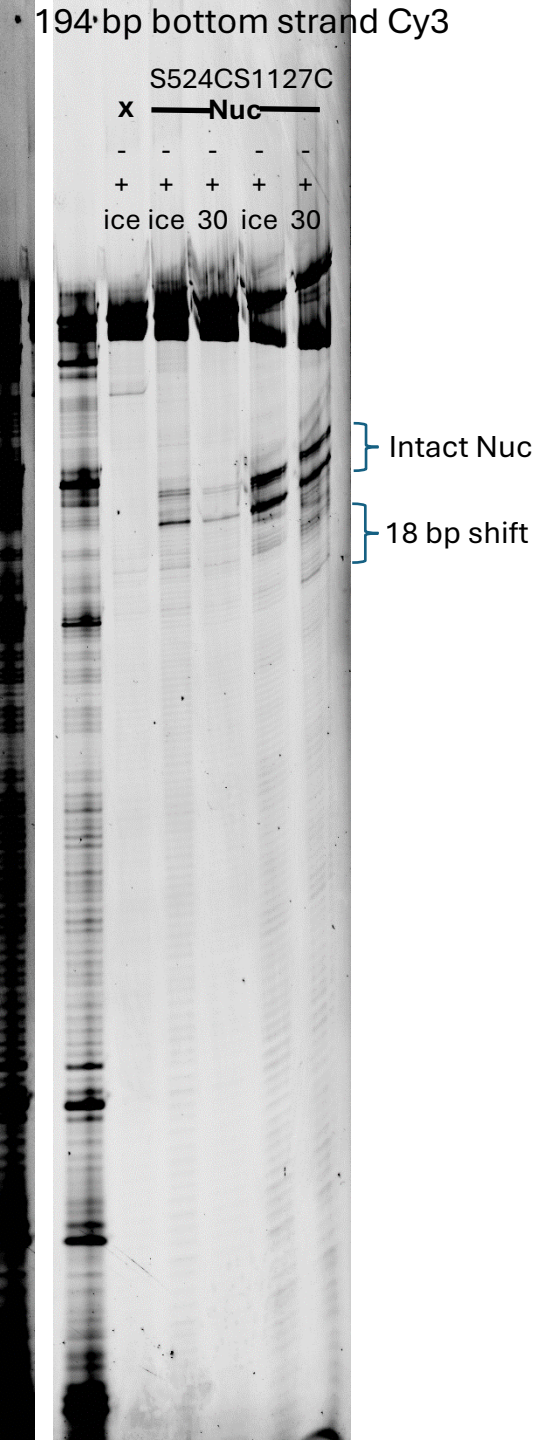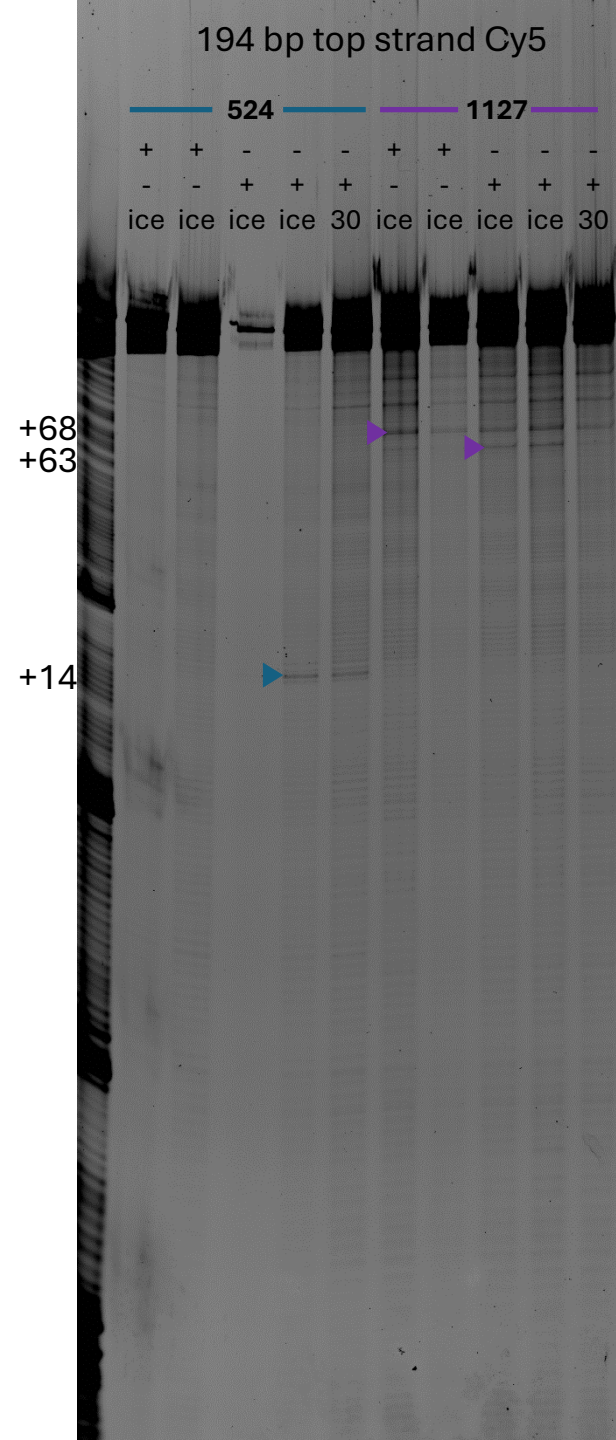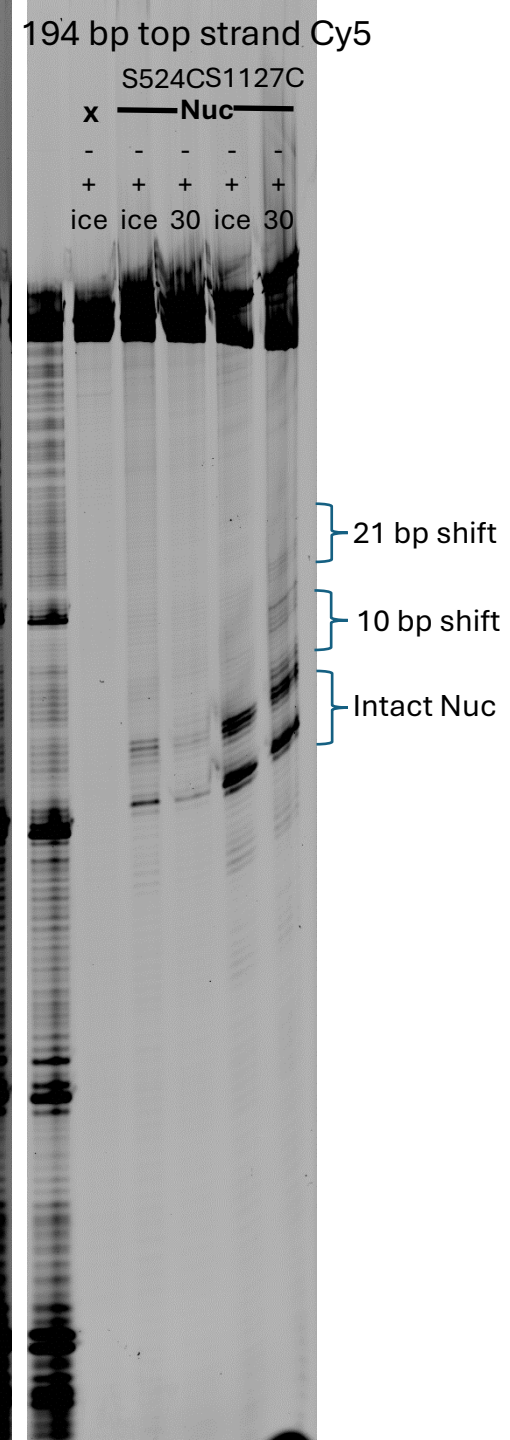



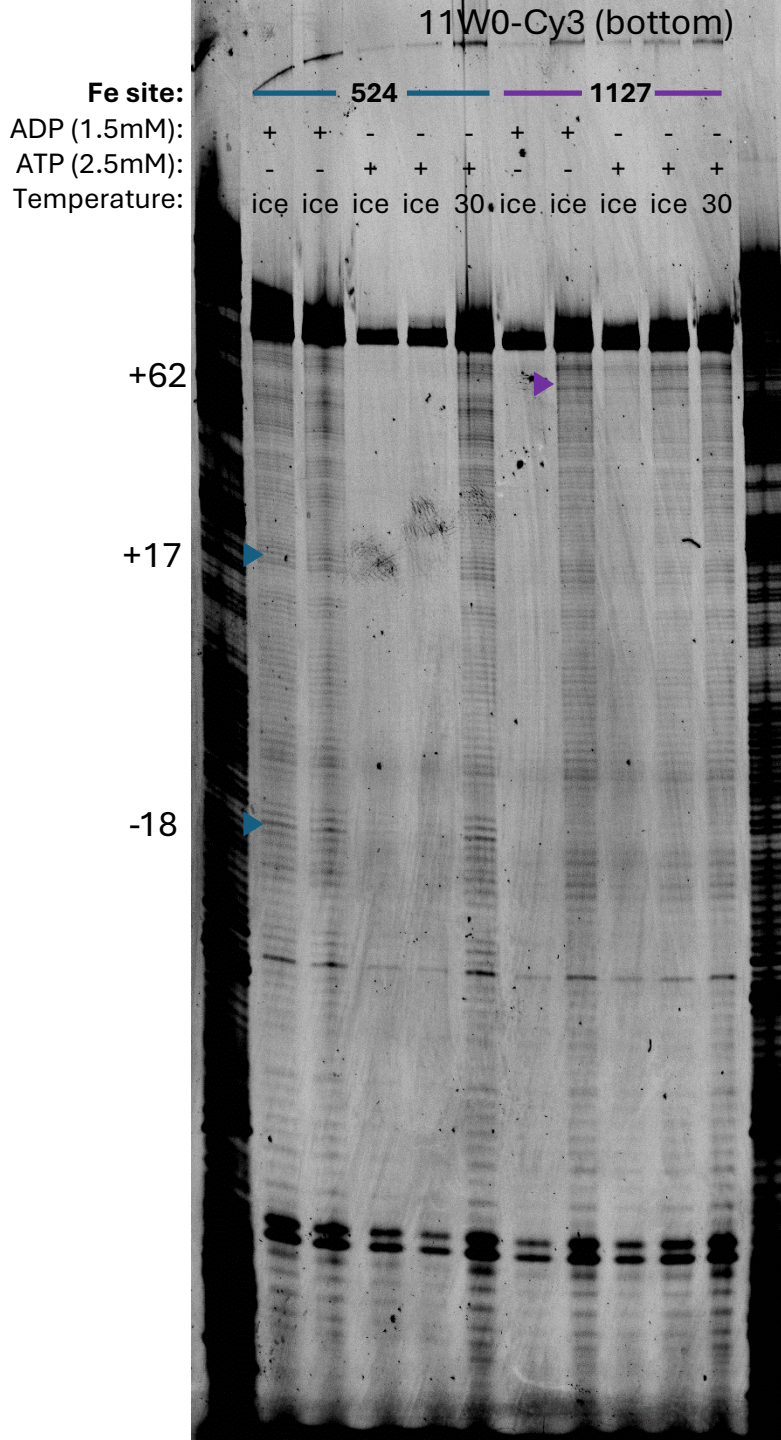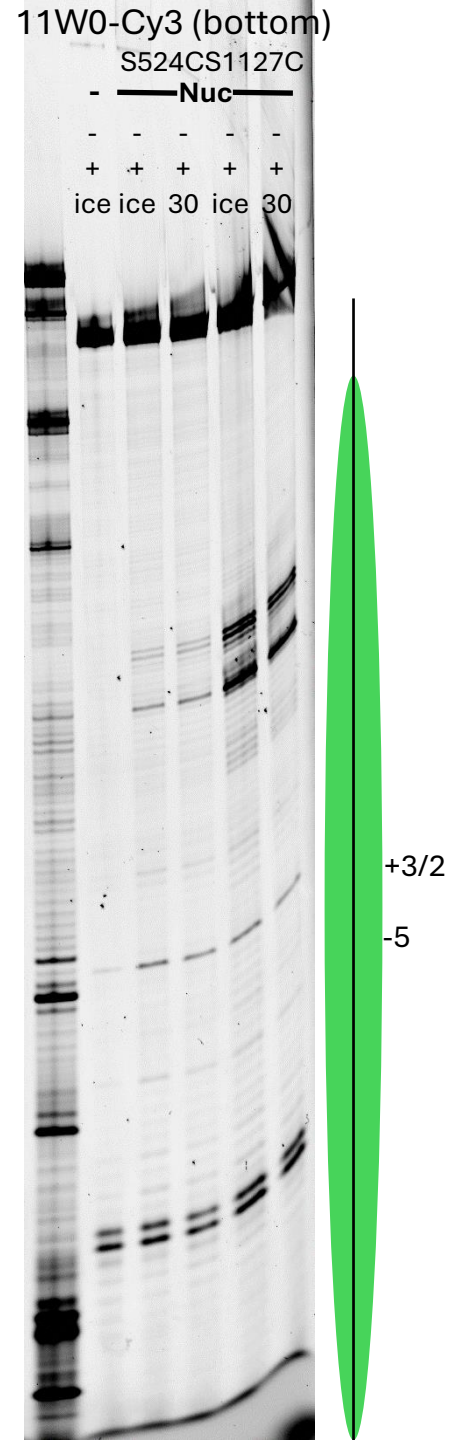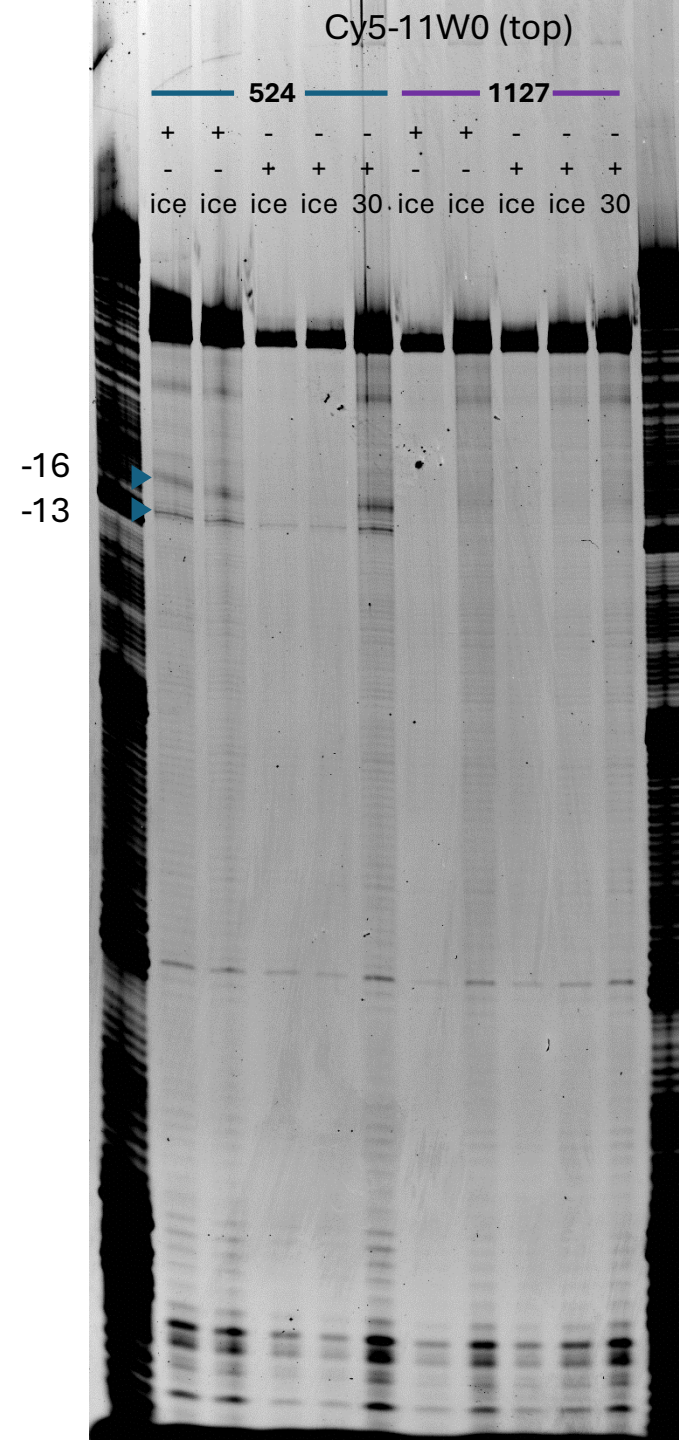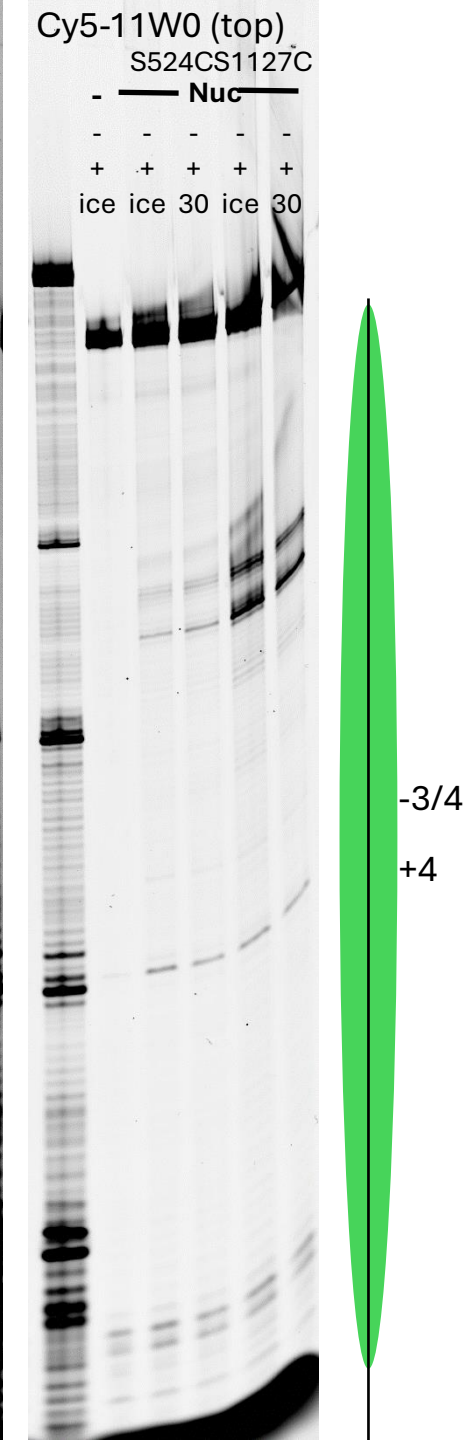

Supplement: supp [file Figure4-source_data-labelled.pdf › Figure4-source_data-labelled.pdf]
