# Supplementary material for: Structural characterisation of chromatin remodelling intermediates supports linker DNA-dependent product inhibition as a mechanism for nucleosome spacing
Source: eLife journal article supplement (doi:10.7554/elife.52513), 2025-12-24
Supplement: supp [file elife_poa_e52513_Figure_3_figure_supplement_4.pdf › elife_poa_e52513_Figure_3_figure_supplement_4.pdf]

|                                           | Nucleosome<br>EMD-53596<br>PDB-9R5W | Complex I<br>EMD-53590<br>PDB-9R5K | Complex II<br>EMD-53597 | Complex III<br>EMD-53595<br>PDB-9R5S |
|-------------------------------------------|-------------------------------------|------------------------------------|-------------------------|--------------------------------------|
| <u>Data collection and processing</u>     |                                     |                                    |                         |                                      |
| Magnification                             | 81,000                              | 81,000                             | 81,000                  | 81,000                               |
| Voltage(kV)                               | 300                                 | 300                                | 300                     | 300                                  |
| Detector                                  | K3                                  | K3                                 | K3                      | K3                                   |
| Electron exposure                         | 46.8                                | 46.8                               | 46.8                    | 46.8                                 |
| Defocus Range                             | (1.5-3.2)                           | (1.5-3.2)                          | (1.5-3.2)               | (1.5-3.2)                            |
| Pixel size                                | 0.55                                | 0.55                               | 0.55                    | 0.55                                 |
| Initial particle images (no.)             | 500,179                             | 500,179                            | 500,179                 | 500,179                              |
| Final particle images (no.)               | 105,495                             | 135,523                            | 147,140                 | 110,285                              |
| Map resolution (Å)                        | 3.74                                | 4.08                               | 4.22                    | 3.83                                 |
| FSC threshold                             | 0.143                               | 0.143                              | 0.143                   | 0.143                                |
| <u>Models</u>                             |                                     |                                    |                         |                                      |
|                                           | DNA, Histones                       | DNA,Histone                        | DNA,Histone             | DNA,Histone,<br>Chd1                 |
| <u>Refinement</u>                         |                                     |                                    |                         |                                      |
| Initial Model                             | 3LZ0                                | 3LZ0,6ftx,7tn3                     | 3LZ0,6ftx,7tn4          | 3LZ0,6ftx,7tn5                       |
| Map sharpening B factor (Å <sup>2</sup> ) | 180                                 | 180                                | 180                     | 180                                  |
| Model Composition                         |                                     |                                    |                         |                                      |
| Non-hydrogen atoms                        | 12494                               | 12495                              | 11905                   | 17426                                |
| Hydrogens                                 | 9773                                | 9774                               | 6695                    | 9675                                 |
| Protein residues                          | 742                                 | 742                                | 735                     | 1390                                 |
| DNA bases                                 | 324                                 | 324                                | 298                     | 320                                  |
| r.m.s deviations                          |                                     |                                    |                         |                                      |
| Bond lengths (Å)                          | 0.004                               | 0.004                              | 0.015                   | 0.006                                |
| Bond Angles (°)                           | 0.702                               | 0.735                              | 1.4                     | 0.837                                |
| Validation                                |                                     |                                    |                         |                                      |
| MolProbity score                          | 1.51                                | 1.56                               | 1.8                     | 1.75                                 |
| Clashscore                                | 7.55                                | 8.58                               | 6.67                    | 6.7                                  |
| CaBLAM outliers (%)                       | 0.7                                 | 0.7                                | 0.57                    | 1.64                                 |
| Rotamer outliers (%)                      | 0                                   | 0                                  | 0.17                    | 0.09                                 |
| Cβ outliers (%)                           | 0                                   | 0                                  | 0.15                    | 0                                    |
| Ramachandran plot                         |                                     |                                    |                         |                                      |
| Favoured (%)                              | 97.52                               | 97.52                              | 97.64                   | 94.5                                 |
| Allowed (%)                               | 2.48                                | 2.48                               | 2.36                    | 5.5                                  |
| Disallowed (%)                            | 0                                   | 0                                  | 0                       | 0                                    |
