# Supplementary material for: Structural characterisation of chromatin remodelling intermediates supports linker DNA-dependent product inhibition as a mechanism for nucleosome spacing
Source: eLife journal article supplement (doi:10.7554/elife.52513), 2025-12-24

Complex I

Histone Octamer

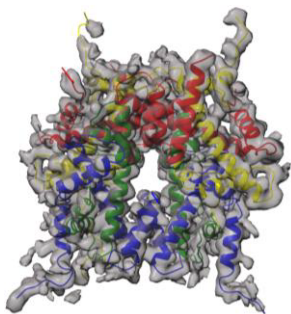

Nucleosome DNA

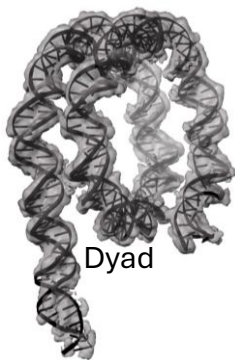

Bound Chd1

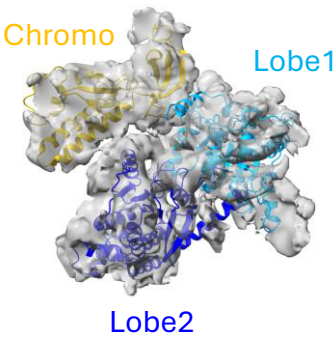

Complex II

Histone Octamer

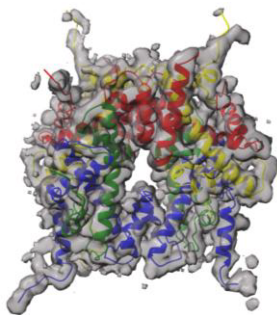

Nucleosome DNA

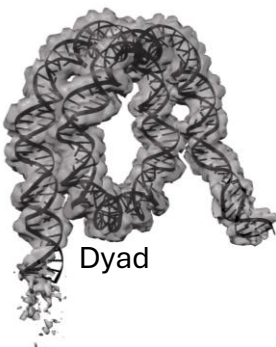

Bound Chd1

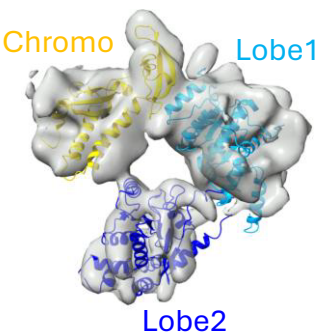

Complex III

Histone Octamer

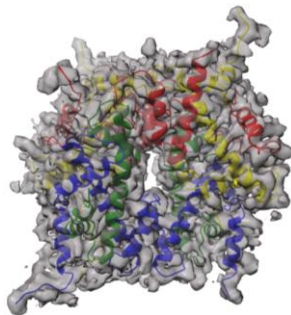

Nucleosome DNA

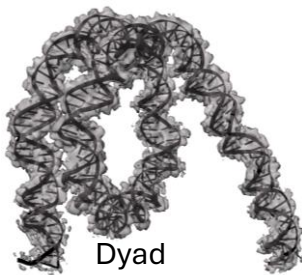

Bound Chd1

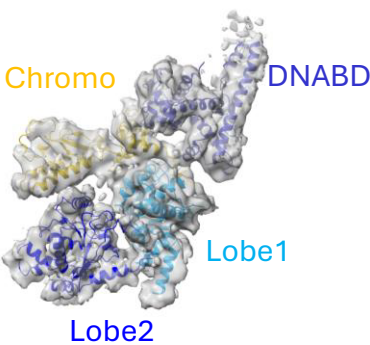

Complex II

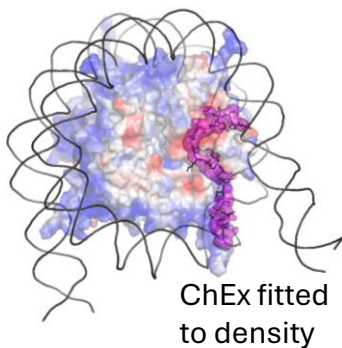

Complex III

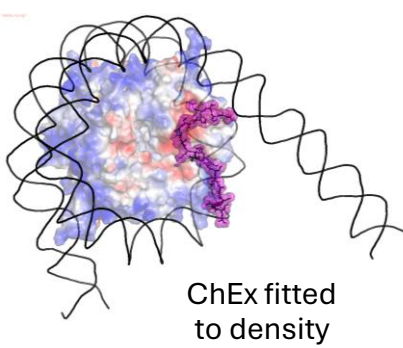

Comparison  
7TN2, Complex II, Complex III

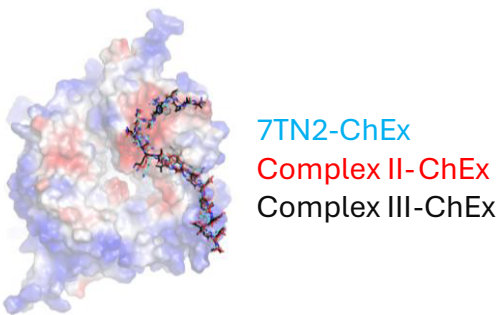

Supplement: supp [file elife_poa_e52513_Figure_3_figure_supplement_5.pdf › elife_poa_e52513_Figure_3_figure_supplement_5.pdf]
