# Supplementary material for: Structural characterisation of chromatin remodelling intermediates supports linker DNA-dependent product inhibition as a mechanism for nucleosome spacing
Source: eLife journal article supplement (doi:10.7554/elife.52513), 2025-12-24
Supplement: supp [file Figure2_source_data-labelled.pdf › Figure2_source_data-labelled.pdf]

|               |   |                 |   |    |    |   |                  |   |    |    |   |                |   |    |    |   |   |   |    |    |   |   |   |    |    |   |   |   |    |    |
|---------------|---|-----------------|---|----|----|---|------------------|---|----|----|---|----------------|---|----|----|---|---|---|----|----|---|---|---|----|----|---|---|---|----|----|
|               |   | Intact Nuc Cy3/ |   |    |    |   | SHL+2biotin,Cy3/ |   |    |    |   | Intact Nuc Cy5 |   |    |    |   |   |   |    |    |   |   |   |    |    |   |   |   |    |    |
|               |   | SHL-2biotin,Cy5 |   |    |    |   |                  |   |    |    |   |                |   |    |    |   |   |   |    |    |   |   |   |    |    |   |   |   |    |    |
| Streptavidin: | - | -               | - | -  | -  | + | +                | + | +  | +  | - | -              | - | -  | -  | + | + | + | +  | +  | - | - | - | -  | -  | + | + | + | +  | +  |
| Time:         | 0 | 4               | 8 | 16 | 32 | 0 | 4                | 8 | 16 | 32 | 0 | 4              | 8 | 16 | 32 | 0 | 4 | 8 | 16 | 32 | 0 | 4 | 8 | 16 | 32 | 0 | 4 | 8 | 16 | 32 |

Cy3 scan

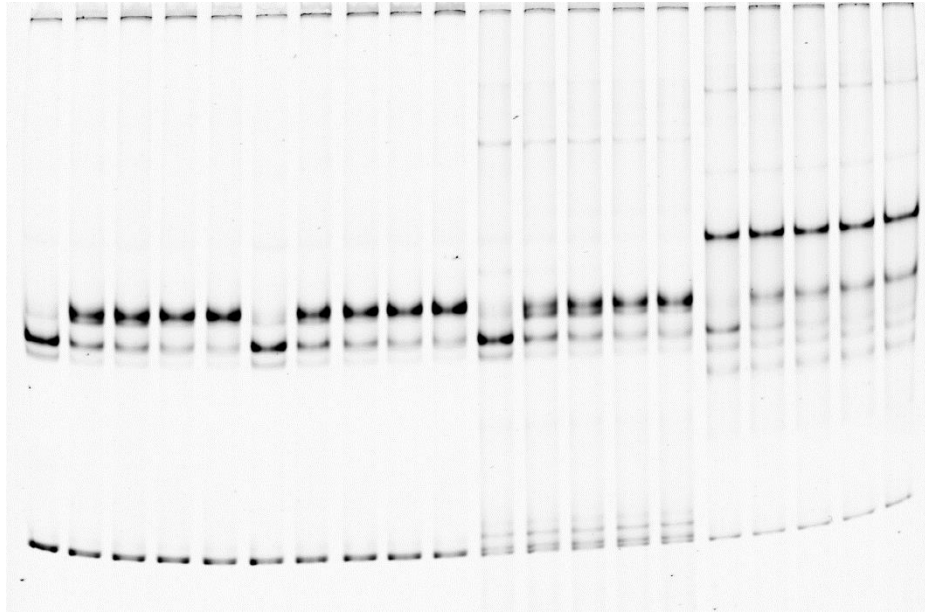

Cy5 scan

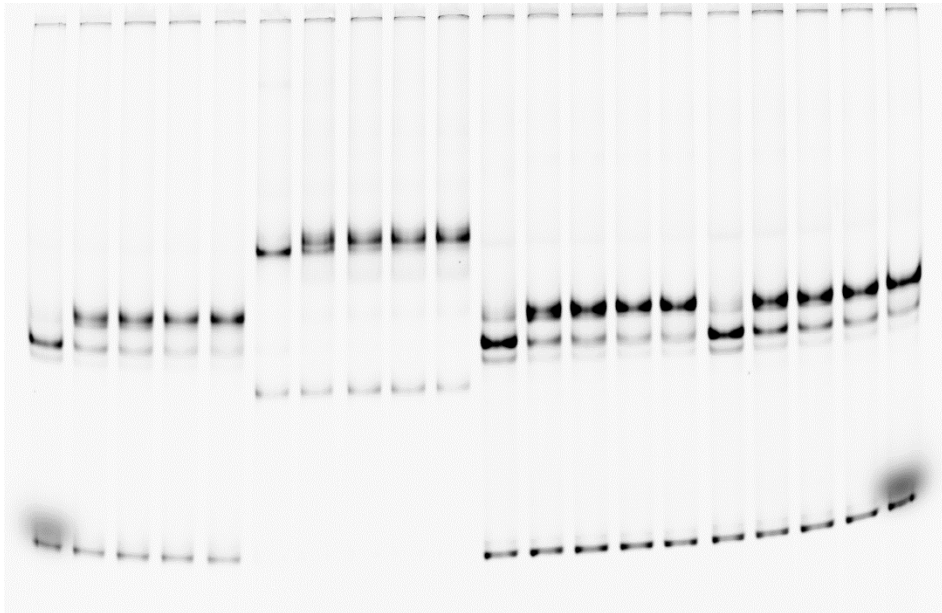

100nM biotin nucleosome  
 100nM wt nucleosome  
 1mM ATP  
 7nM yChd1 1-1305  
 +/- 1.6uM streptavidin

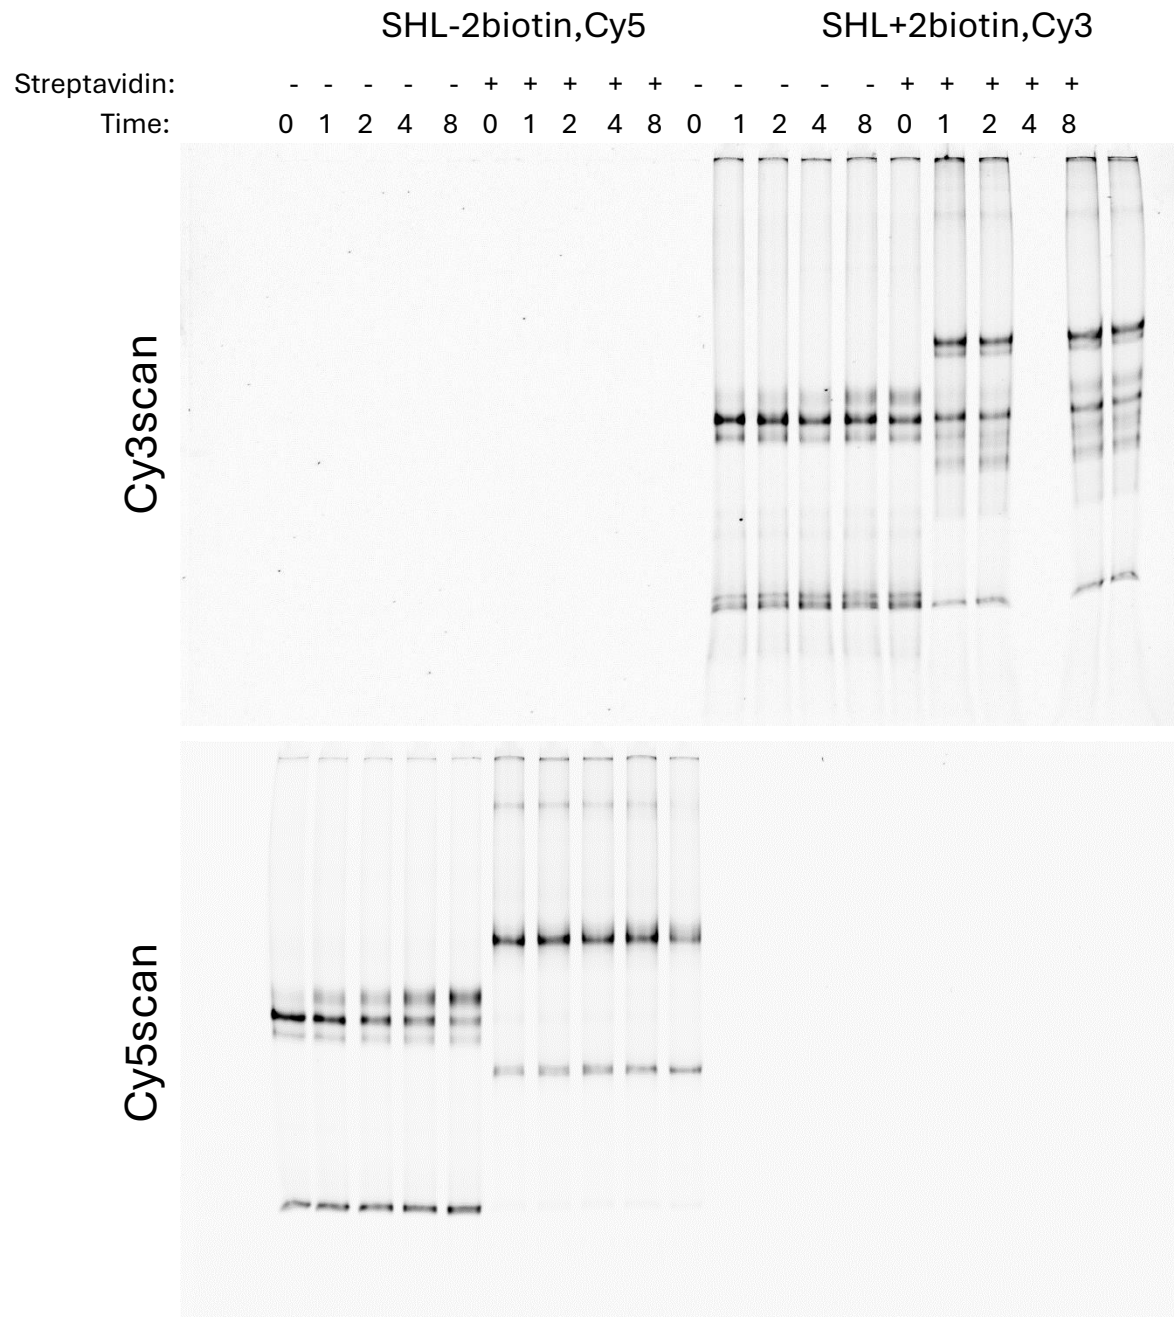

100nM biotin nucleosome  
 5nM yChd1 1-1305  
 1mM ATP  
 +/- 0.4uM streptavidin

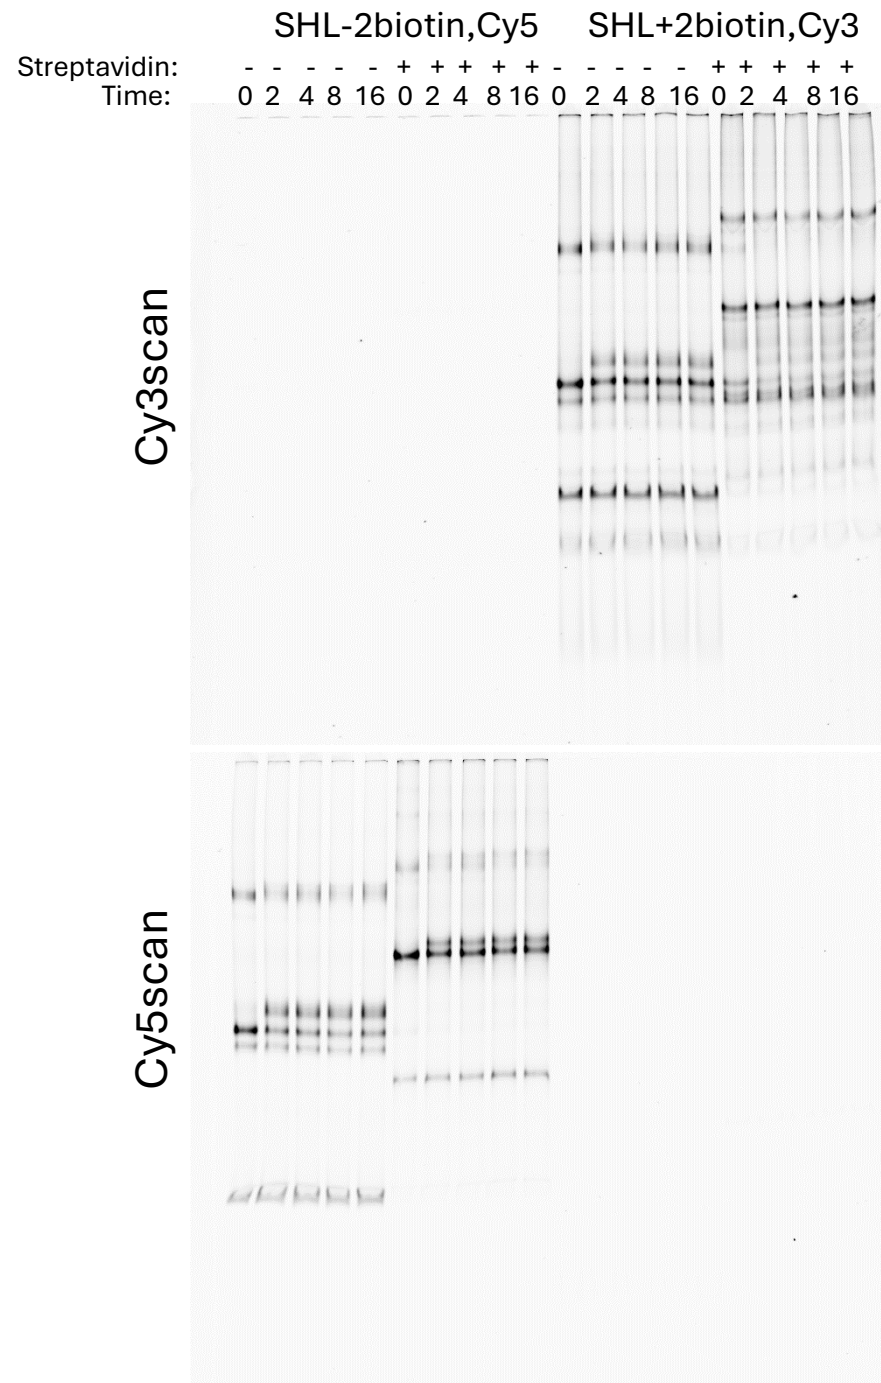

100nM biotin nucleosome  
 300nM yChd1 1-1305  
 2.5uM ATP  
 +/-0.8uM streptavidin



Chd1:  
Streptavidin:  
Mapping:

SHL+2biotin,Cy3  
(bottom)

|   |   |   |   |   |
|---|---|---|---|---|
| - | + | + | + | + |
| + | - | - | + | + |
| + | - | + | - | + |

Intact Nuc  
Cy5

|   |   |   |
|---|---|---|
| + | + | + |
| - | + | + |
| + | - | + |

SHL-2biotin,Cy5  
(bottom)

|   |   |   |   |   |
|---|---|---|---|---|
| - | + | + | + | + |
| + | - | - | + | + |
| + | - | + | - | + |

Initial loc  
10 bp shift  
20 bp shift

100nM nucleosome  
7nM yChd1 1-305  
1mM ATP  
+/-1.6uM streptavidin

Time:  
Streptavidin:  
Mapping:

SHL+2biotin,Cy3  
(bottom)  
0 0 8 8 8 8  
- + - - + +  
+ + - + - +

SHL-2biotin,Cy5  
(bottom)  
0 0 8 8 8 8  
- + - - + +  
+ + - + - +

Intial loc  
10 bp shift  
20 bp shift, centre

100nM nucleosome  
5nM yChd1 1-1305  
1mM ATP  
+/- 0.4uM streptavidin



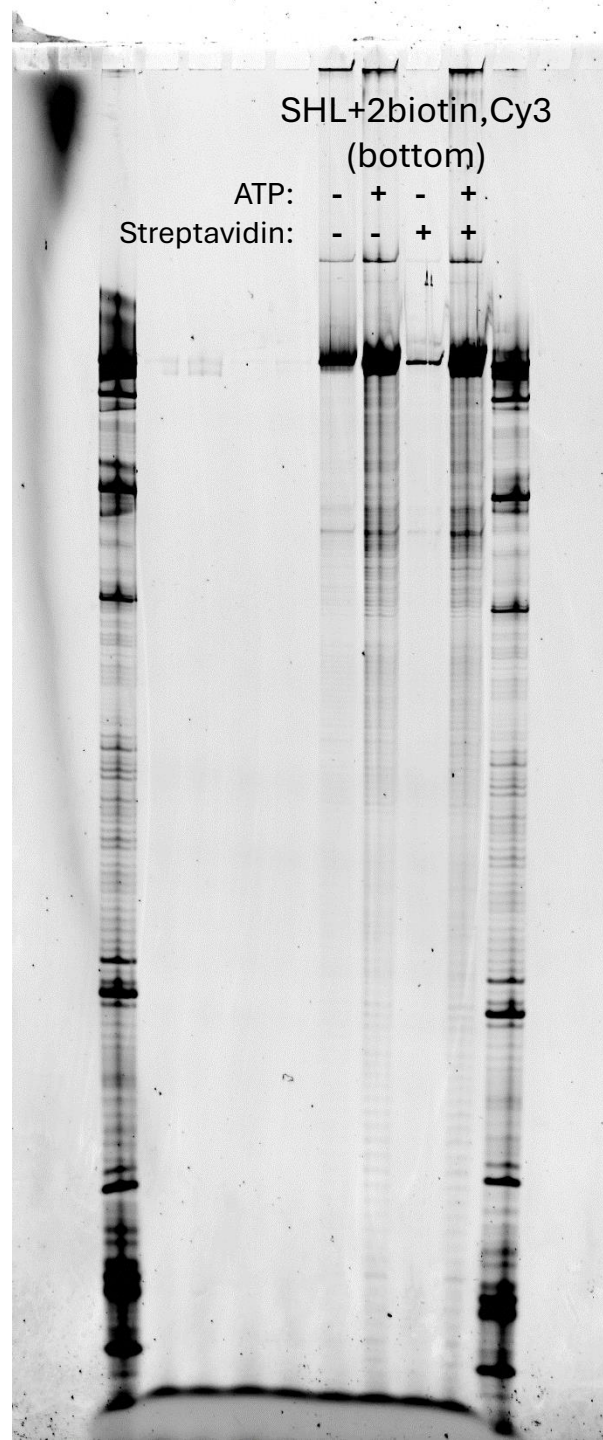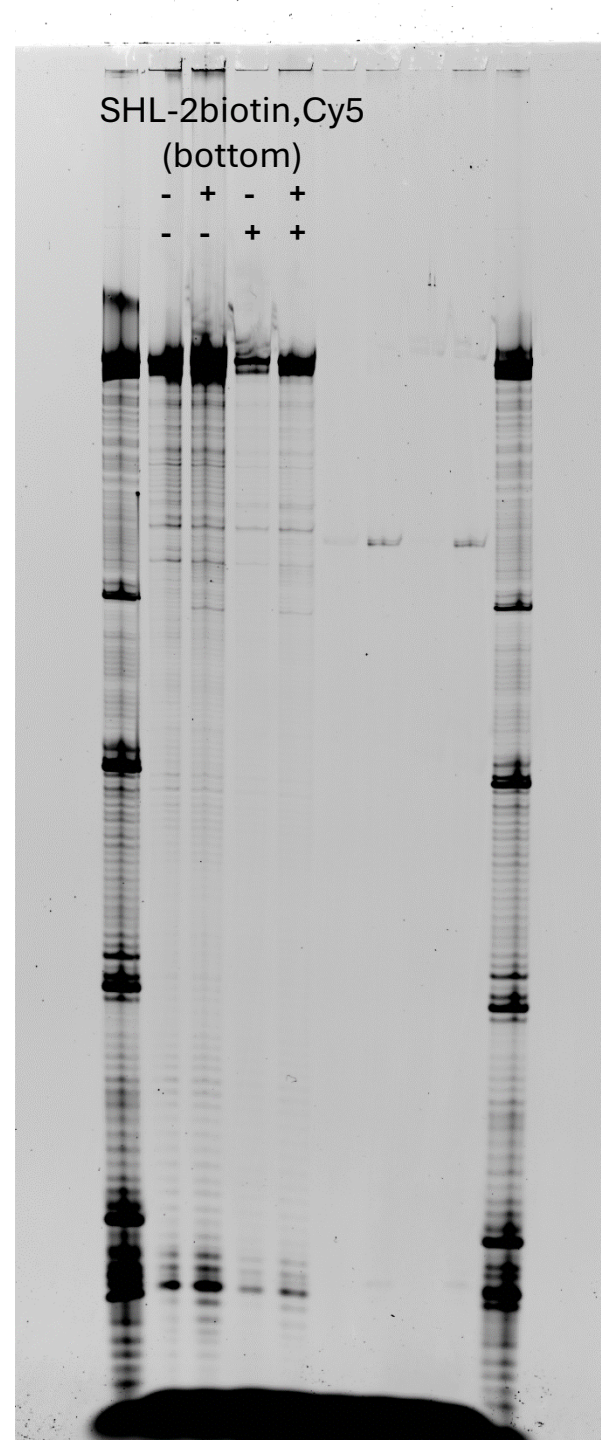

Initial loc

20 bp shift, centre

100nM nucleosome  
300nM yChd1 1-1305  
2.5uM ATP  
16 minute sliding @30C  
+/-0.8uM streptavidin

SHL-2biotin,Cy5 (bottom)

|                  |   |   |   |   |   |   |   |   |
|------------------|---|---|---|---|---|---|---|---|
| ATP (7.5uM):     | - | - | - | - | + | + | + | + |
| ADP-BeF (1.5uM): | + | + | + | + | - | - | - | - |
| SA (0.8uM)       | - | - | + | + | - | - | + | + |
| Mapping:         | - | + | - | + | - | + | - | + |

+21  
+32

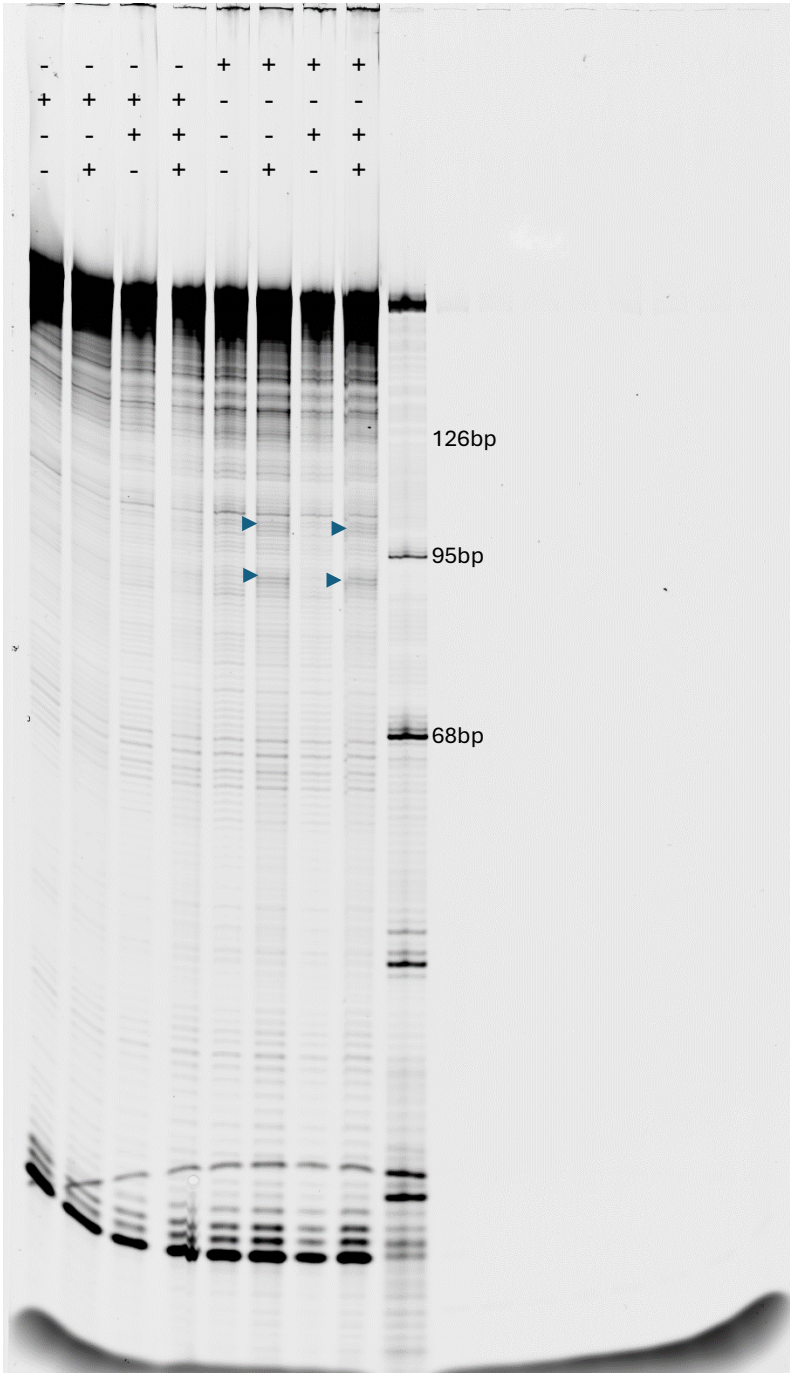

SHL+2biotin,Cy3 (bottom)

|                  |   |   |   |   |   |   |   |   |
|------------------|---|---|---|---|---|---|---|---|
| ATP (7.5uM):     | + | + | + | + | - | - | - | - |
| ADP-BeF (1.5uM): | - | - | - | - | + | + | + | + |
| SA (0.8uM)       | + | + | - | - | + | + | - | - |
| Mapping:         | + | - | + | - | + | - | + | - |

-15

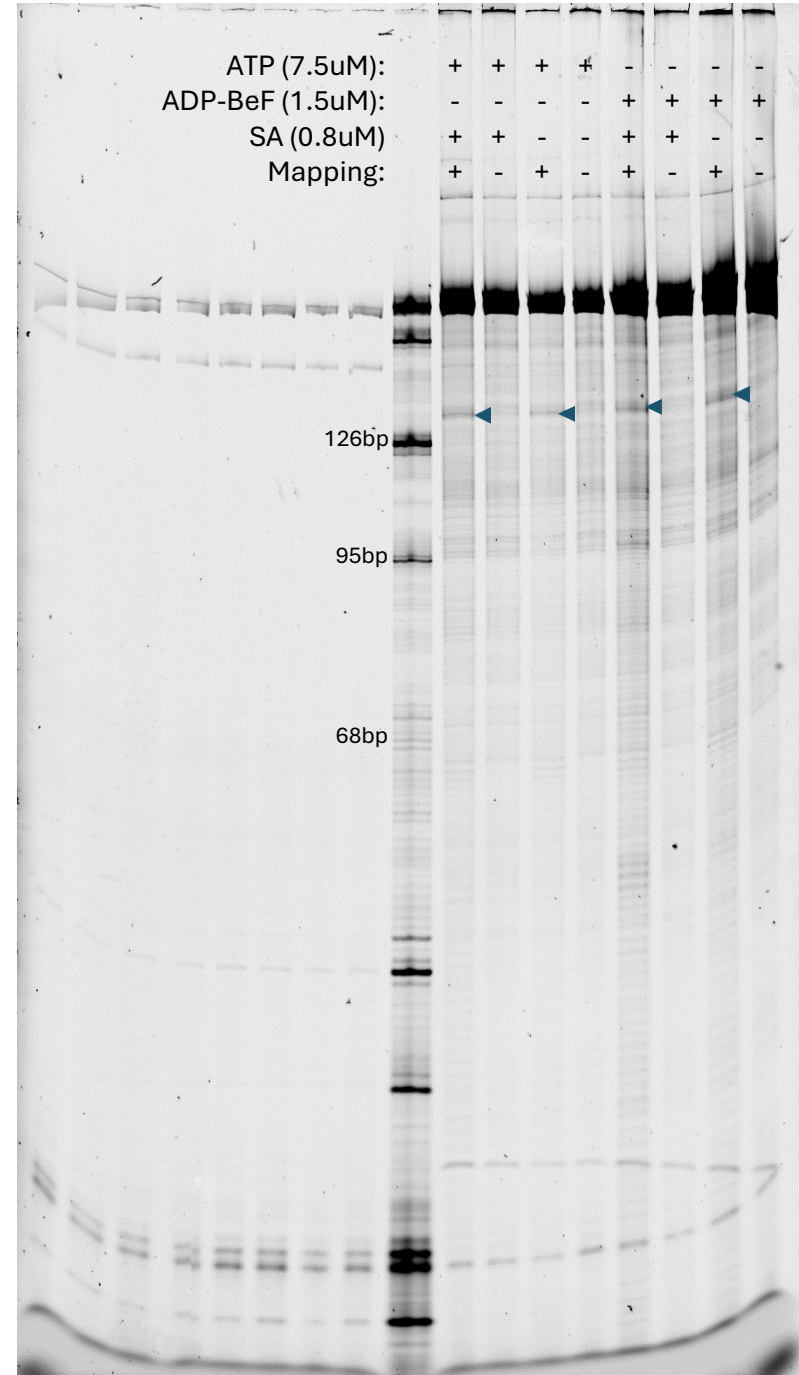



SHL-2biotin,Cy5 (bottom)

**Fe site:**

ATP (2.5uM):

ADP-BeF (1.5uM):

SA(0.8uM):

**524****-**

- - + + +

+ + - - -

- + - + +

+21

+32

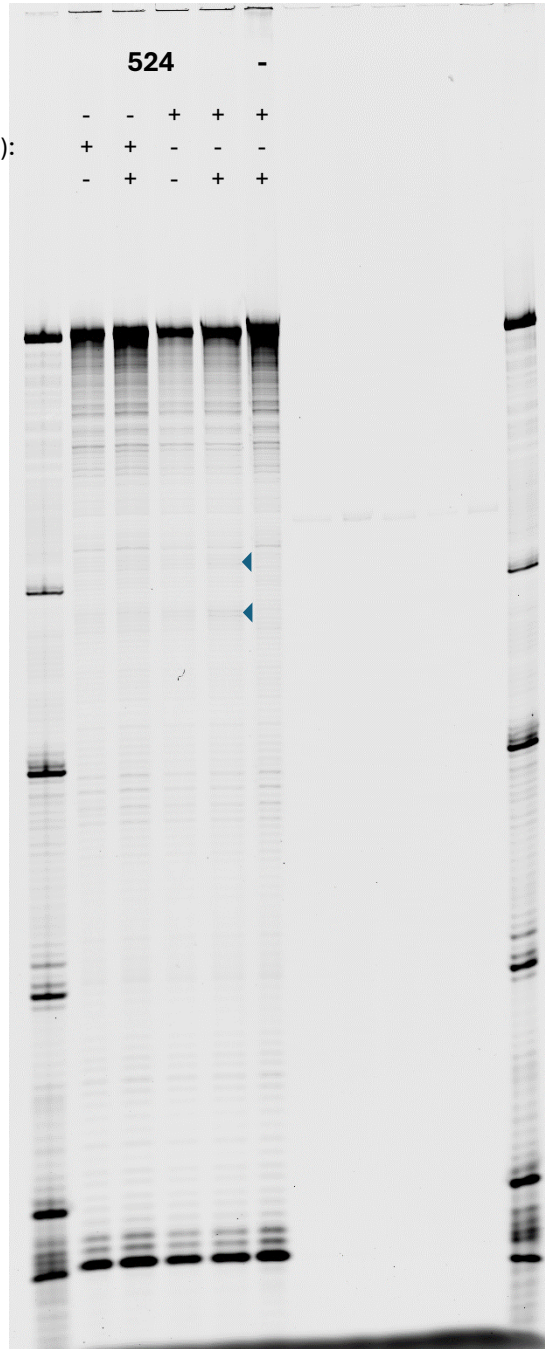

SHL+2biotin,Cy3 (bottom)

**524****-**

ATP (2.5uM):

ADP-BeF (1.5uM):

SA(0.8uM):

- - - + + +

+ + - - -

- + - + +

126bp

95bp

68bp

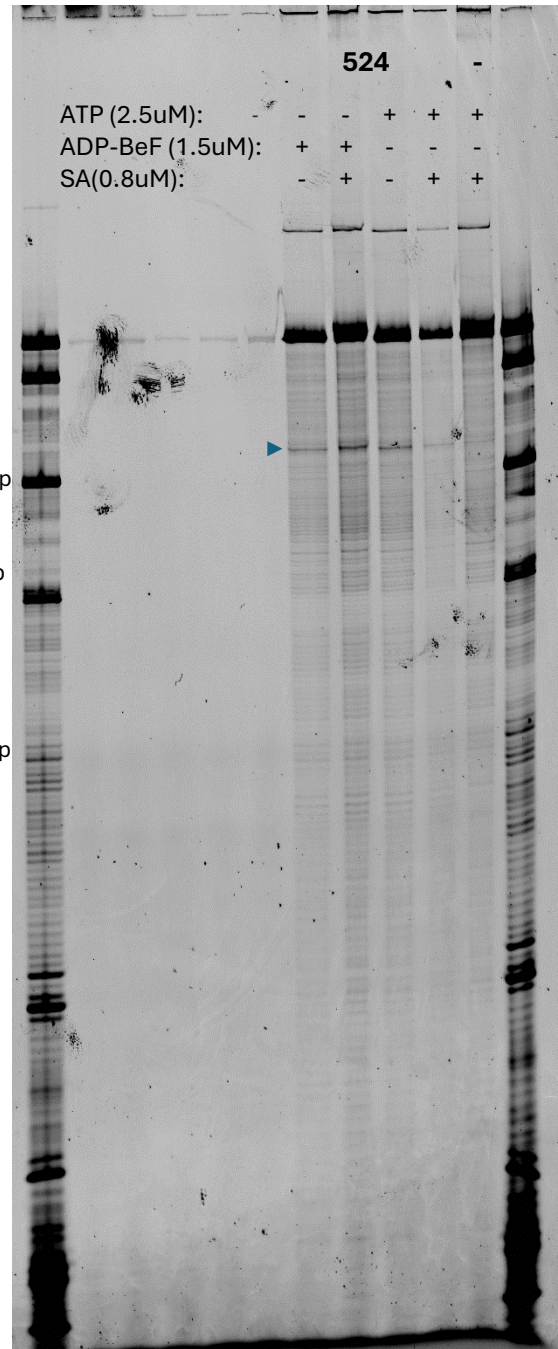

-15
