# Supplementary figures and images for: Structural characterisation of chromatin remodelling intermediates supports linker DNA-dependent product inhibition as a mechanism for nucleosome spacing
Source: eLife journal article supplement (doi:10.7554/elife.52513), 2025-12-24

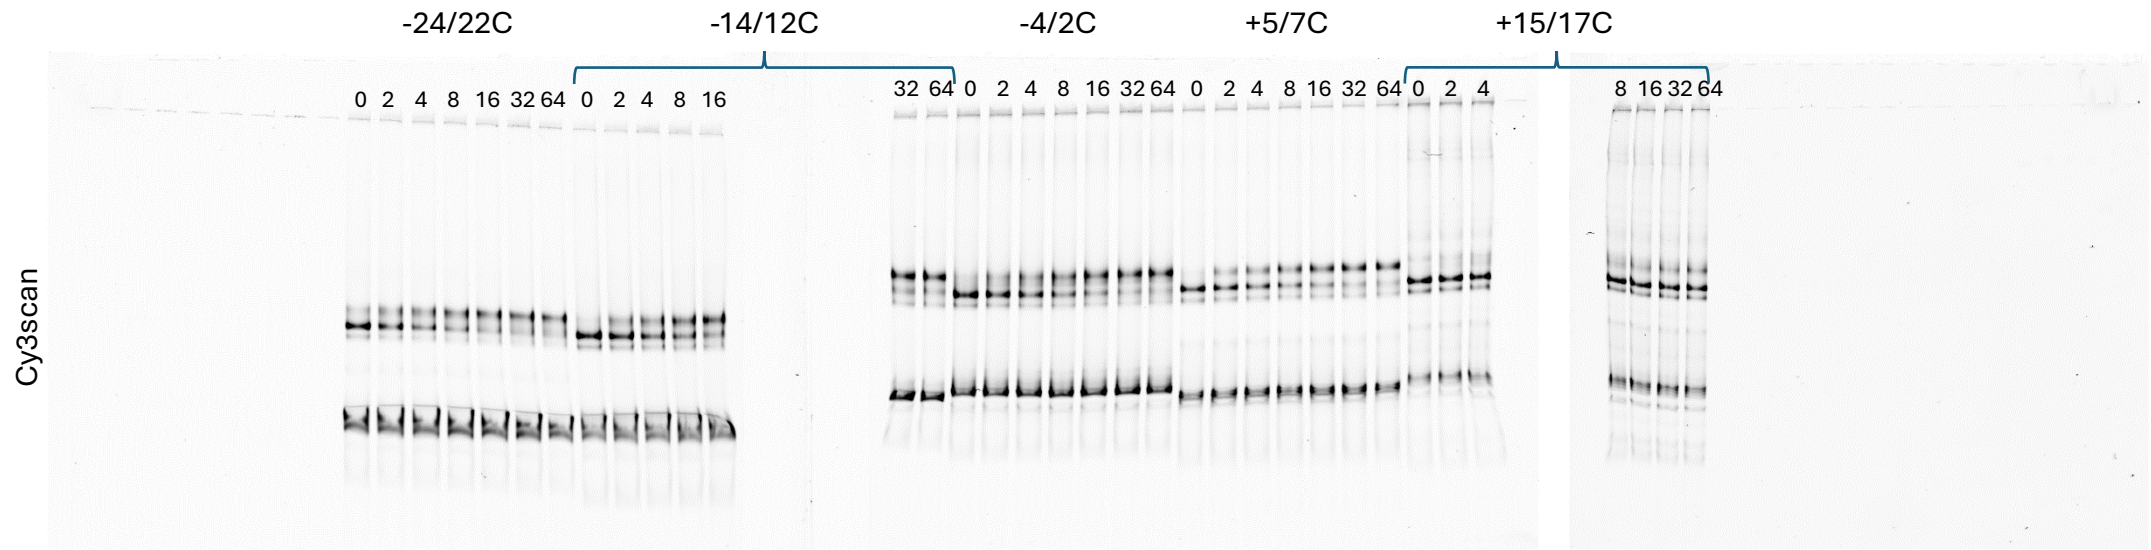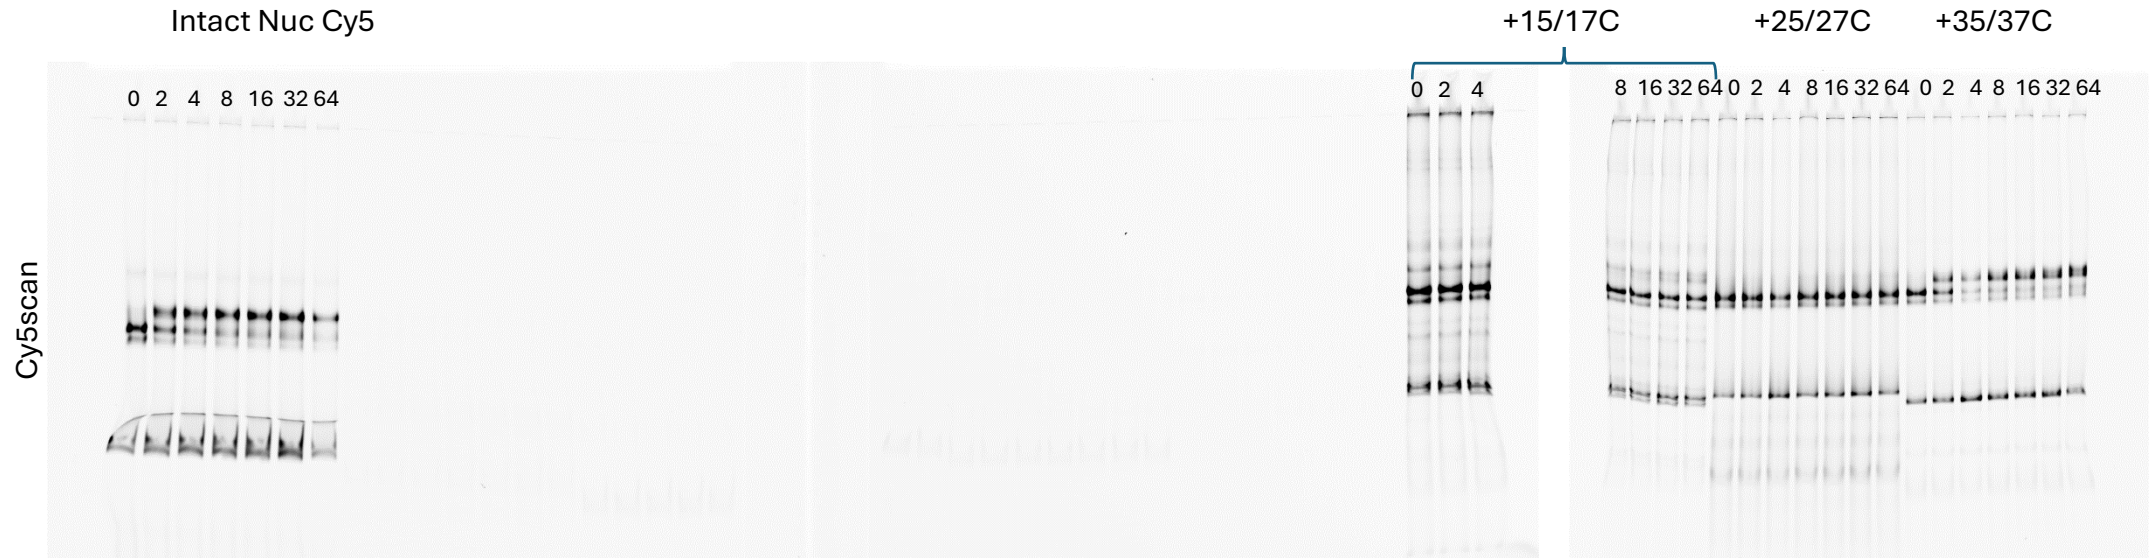

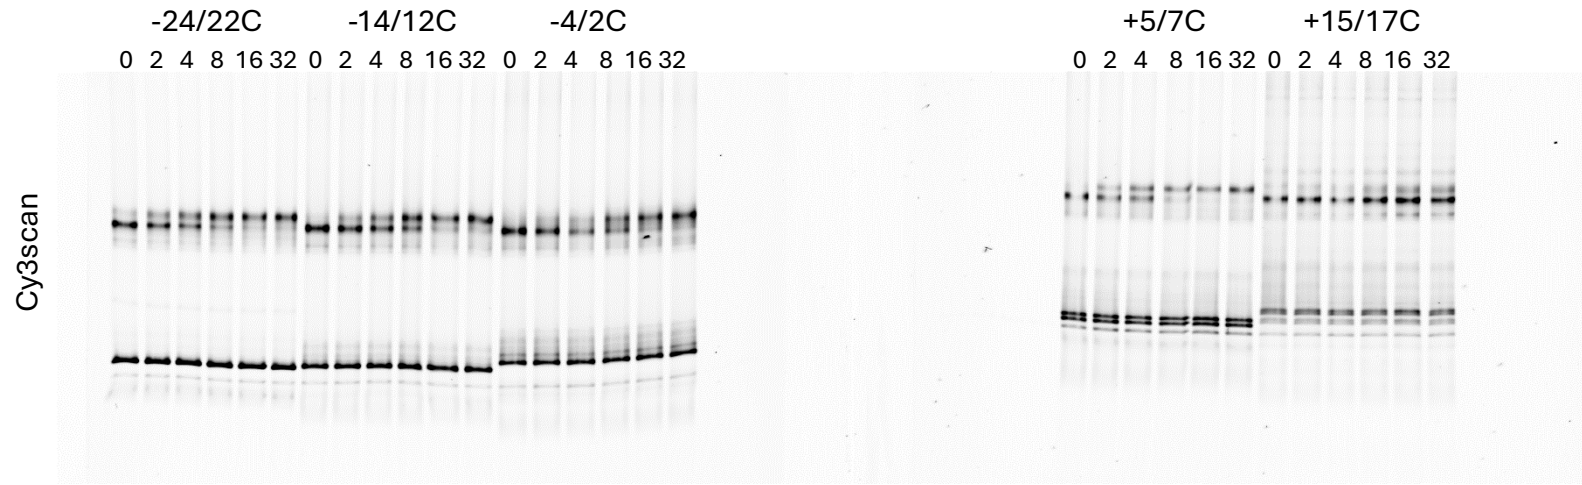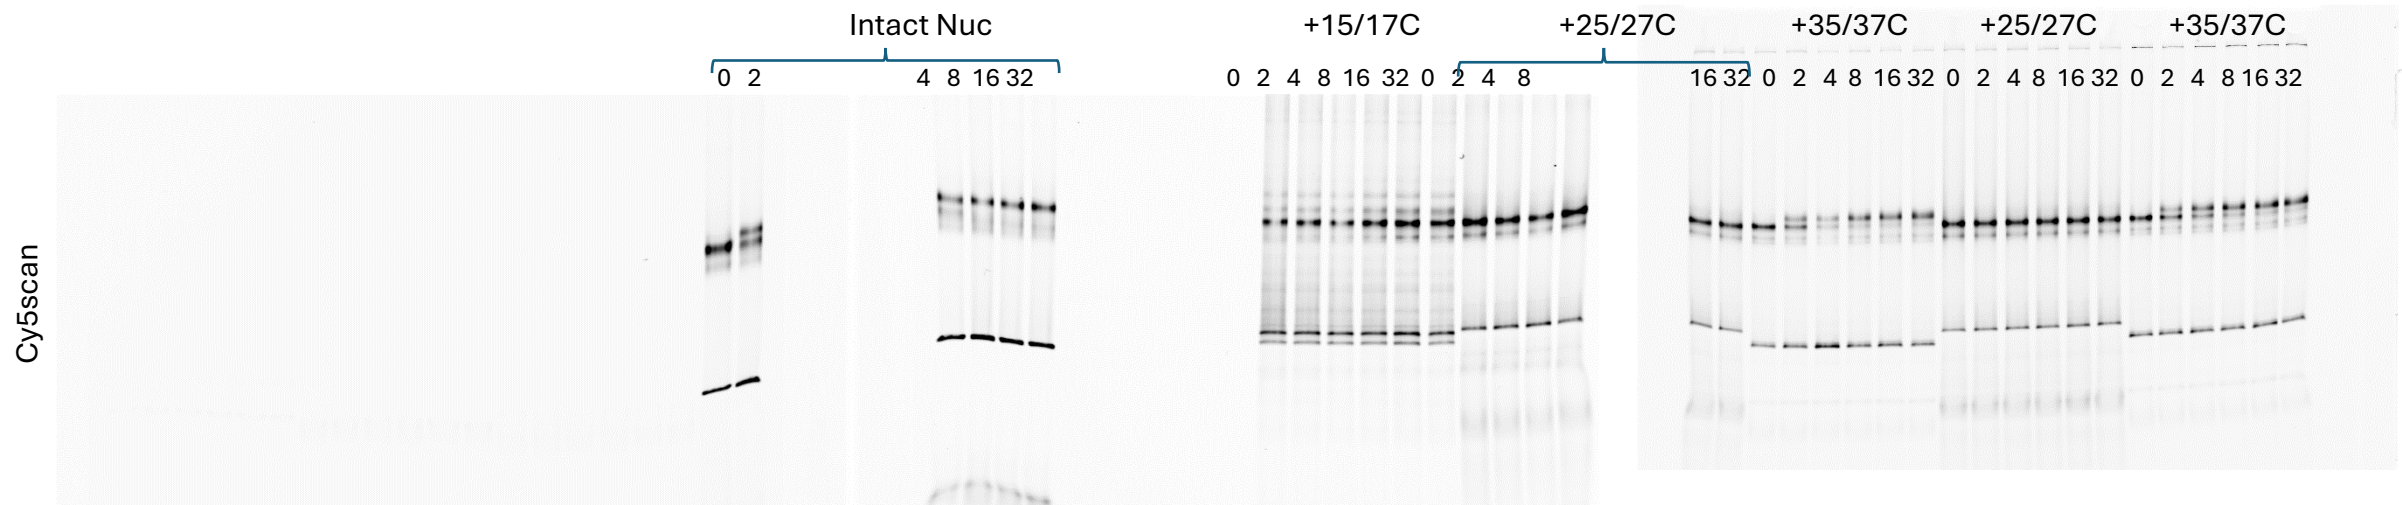



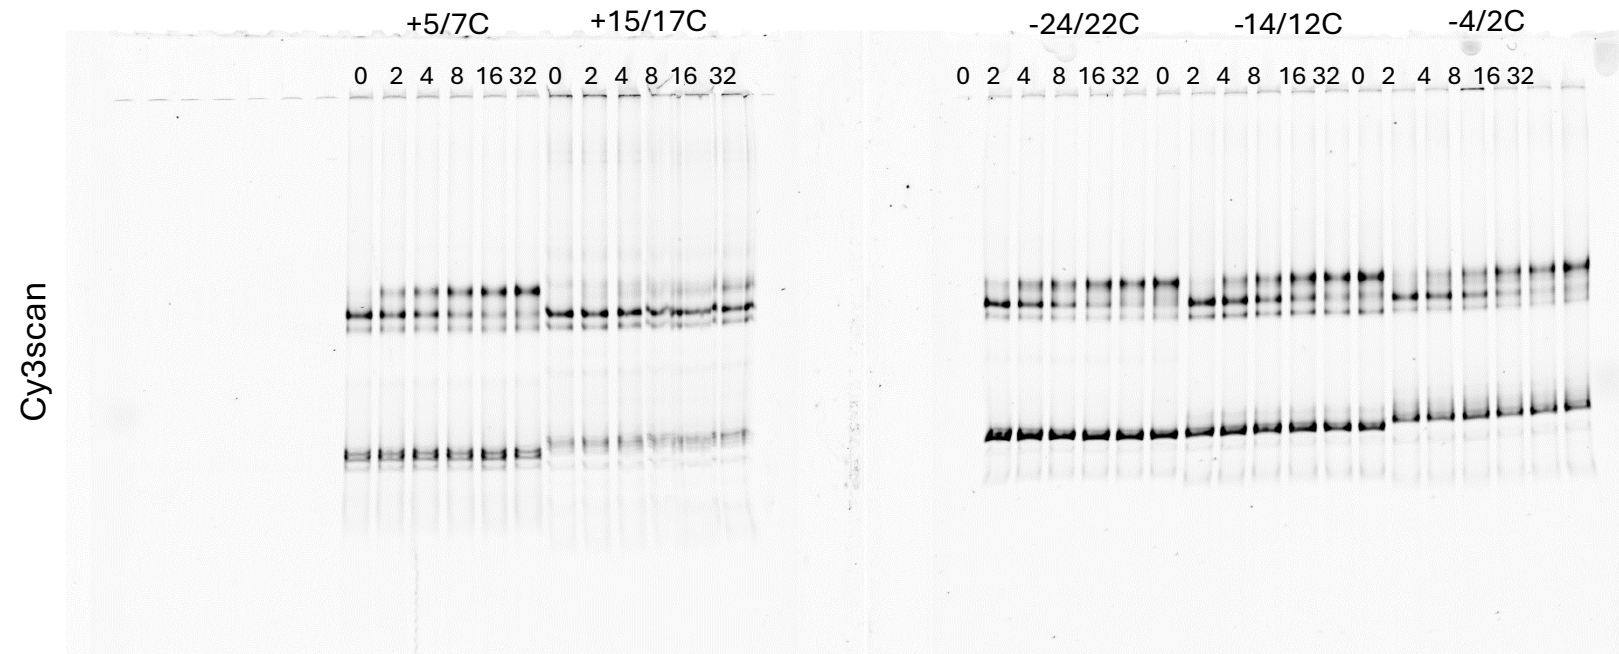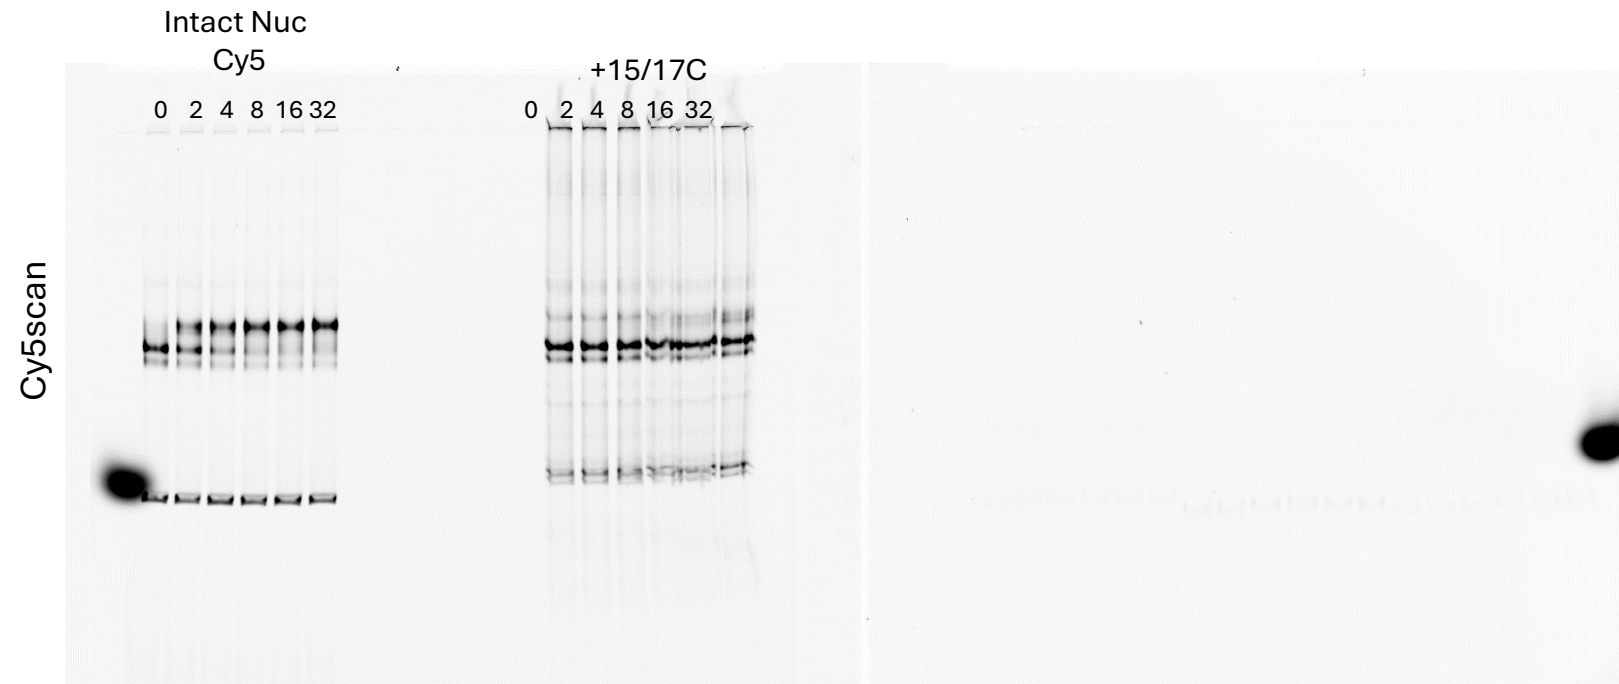

Cy3scan

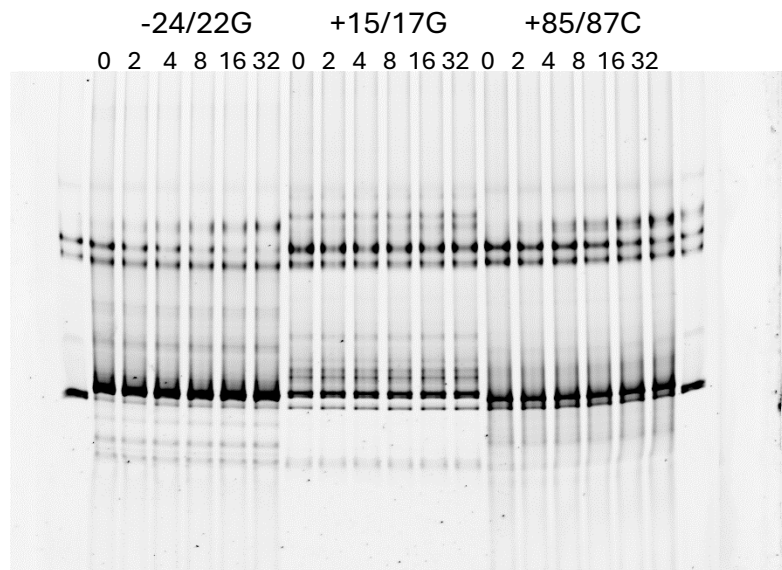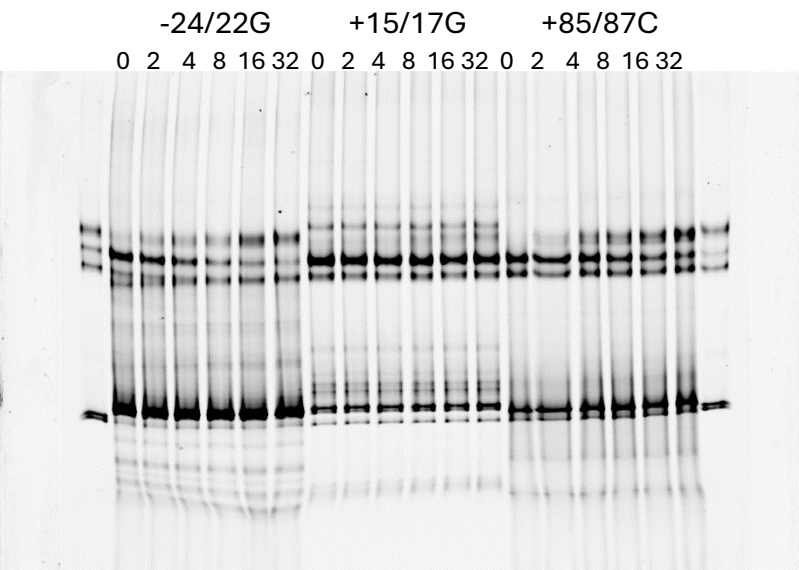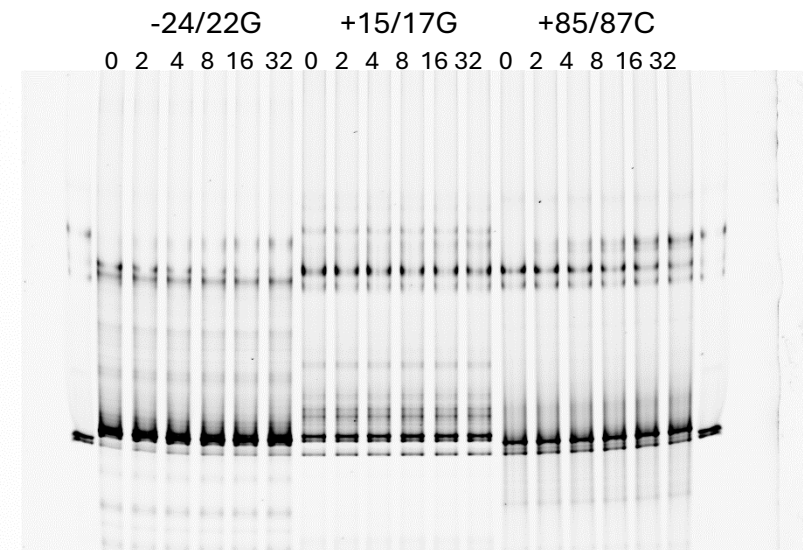

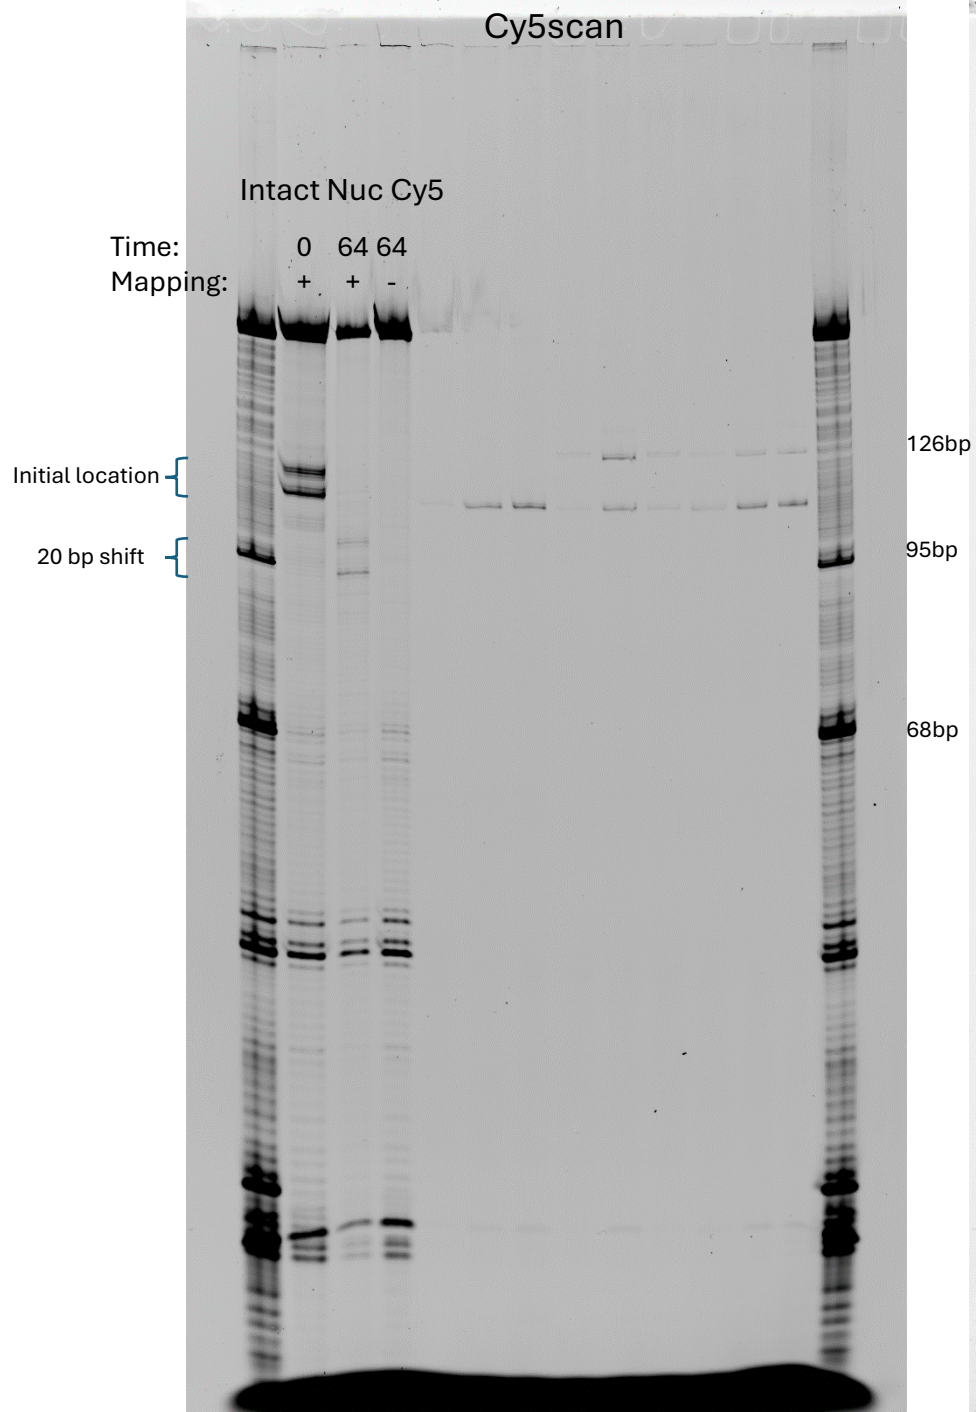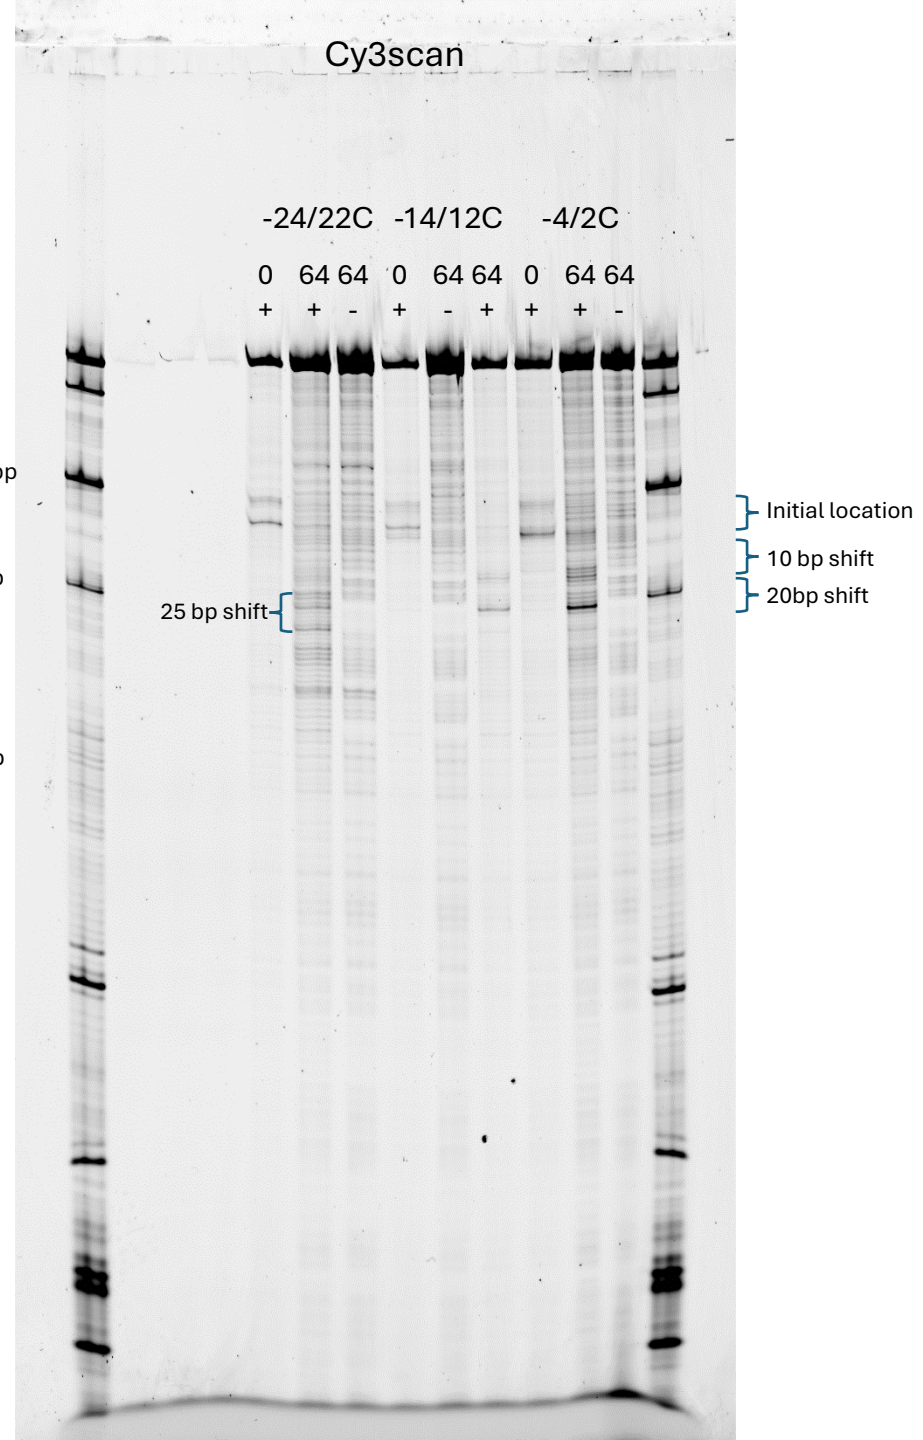



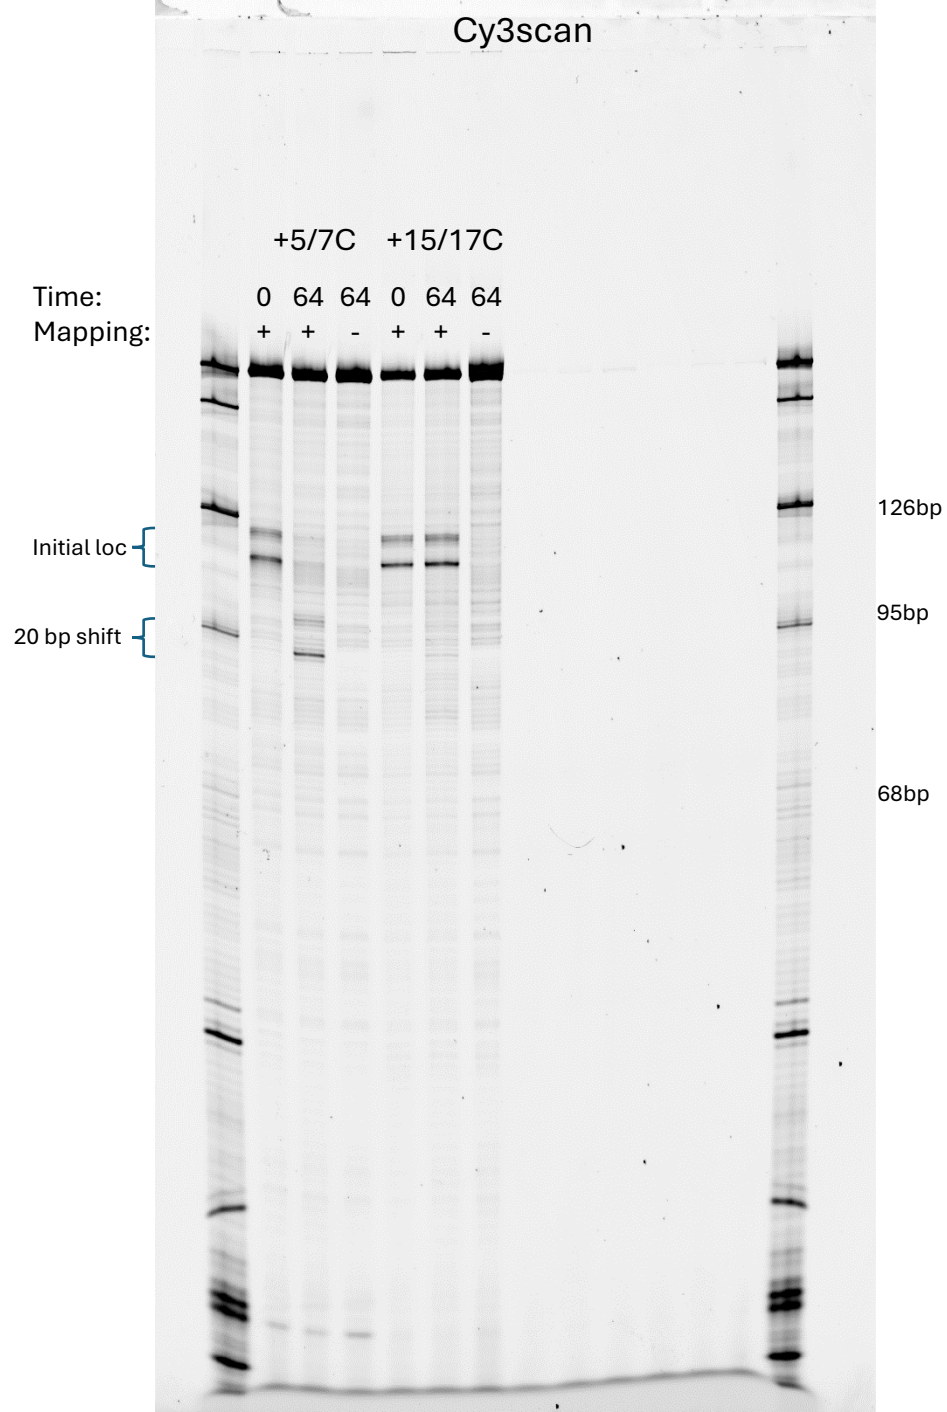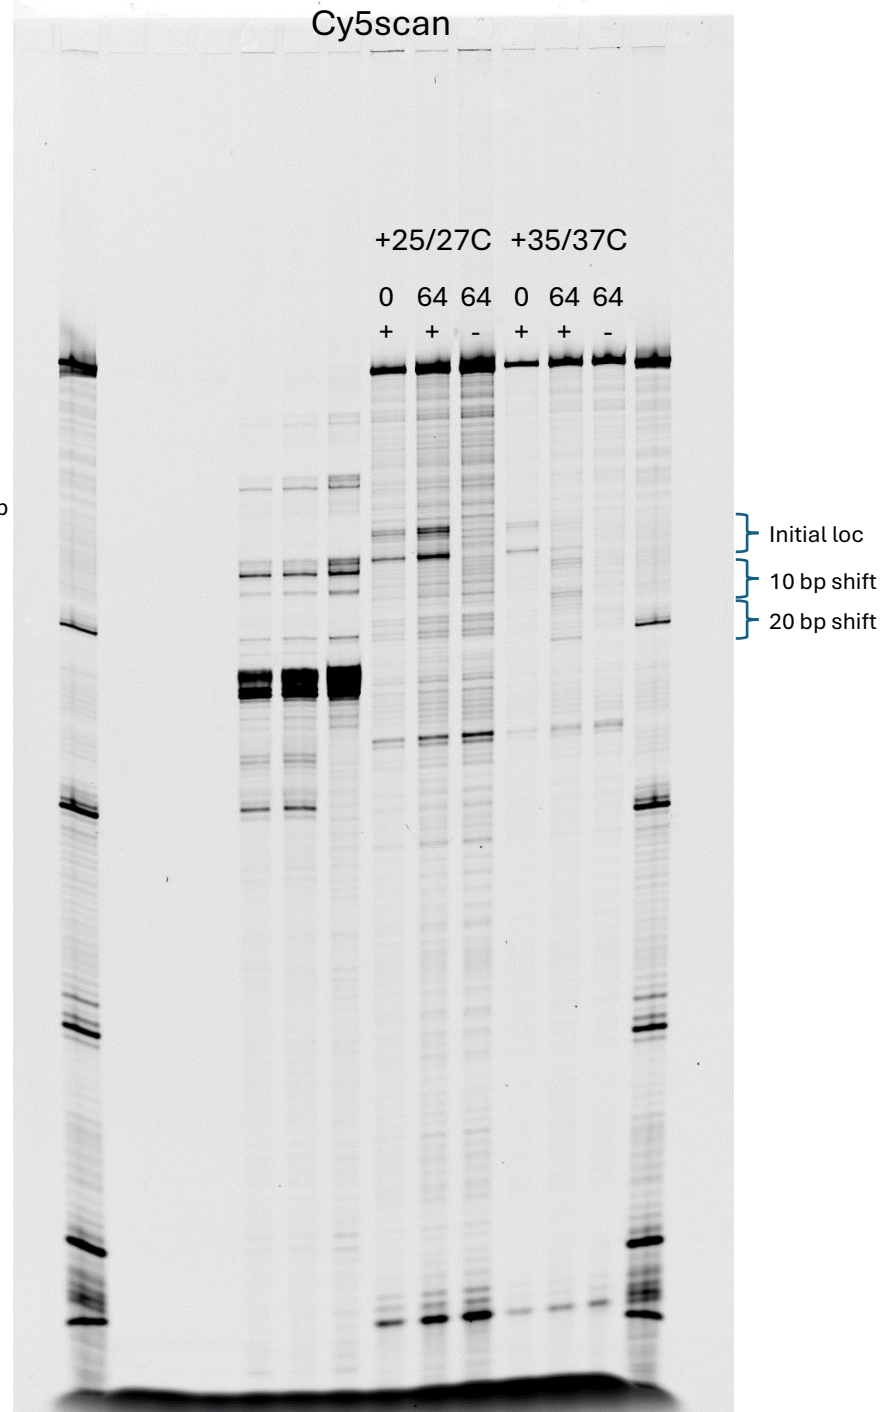

# Cy3scan

|          | -24/22C |    |   | -14/12C |    |   | -4/2C |    |   | +5/7C |    |   | +15/17C |    |   |
|----------|---------|----|---|---------|----|---|-------|----|---|-------|----|---|---------|----|---|
| Time:    | 32      | 32 | 0 | 32      | 32 | 0 | 32    | 32 | 0 | 32    | 32 | 0 | 32      | 32 | 0 |
| Mapping: | -       | +  | + | -       | +  | + | -     | +  | + | -     | +  | + | -       | +  | + |

Initial loc {  
 10 bp shift {  
 20bp shift {  
 25 bp shift {

126bp

95bp

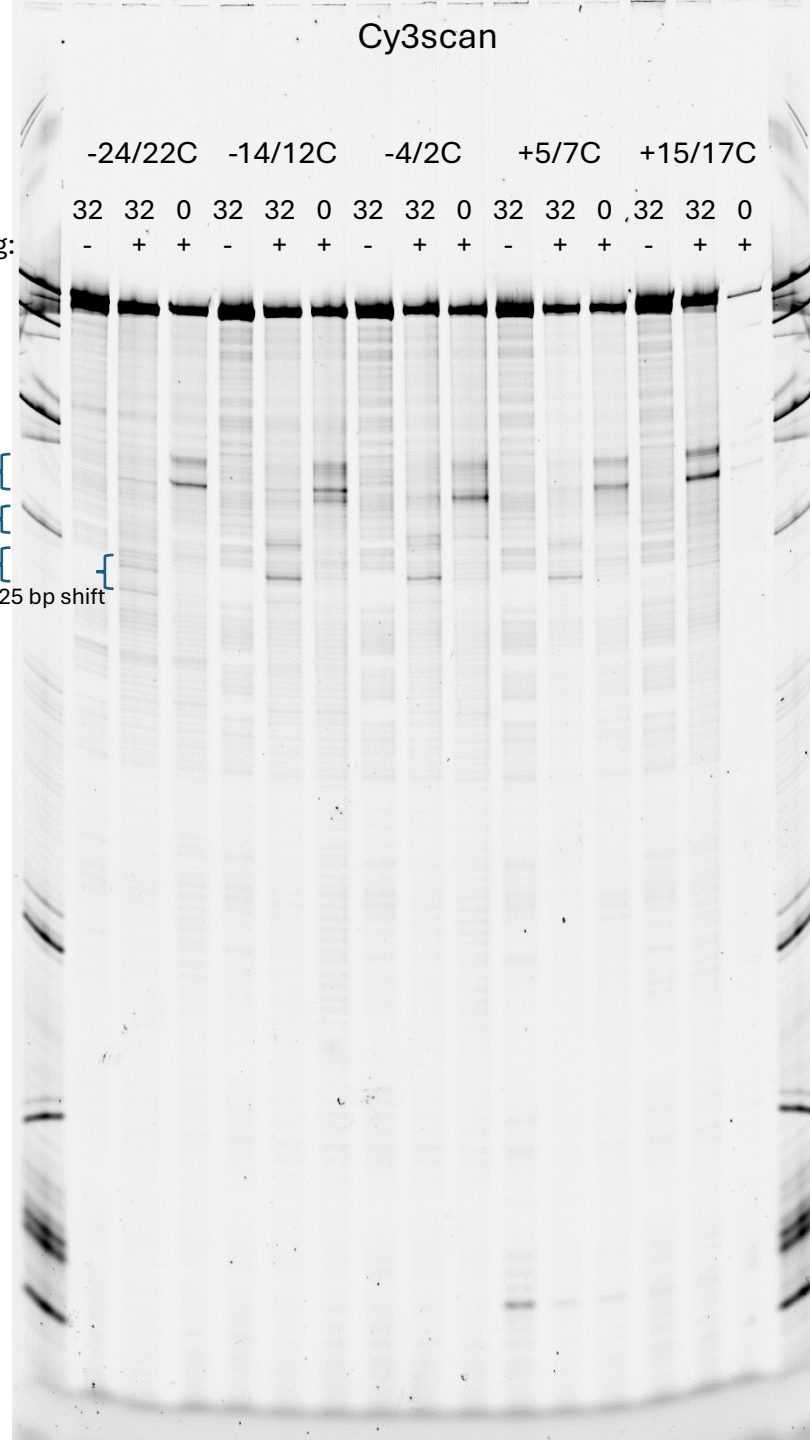

Cy5scan

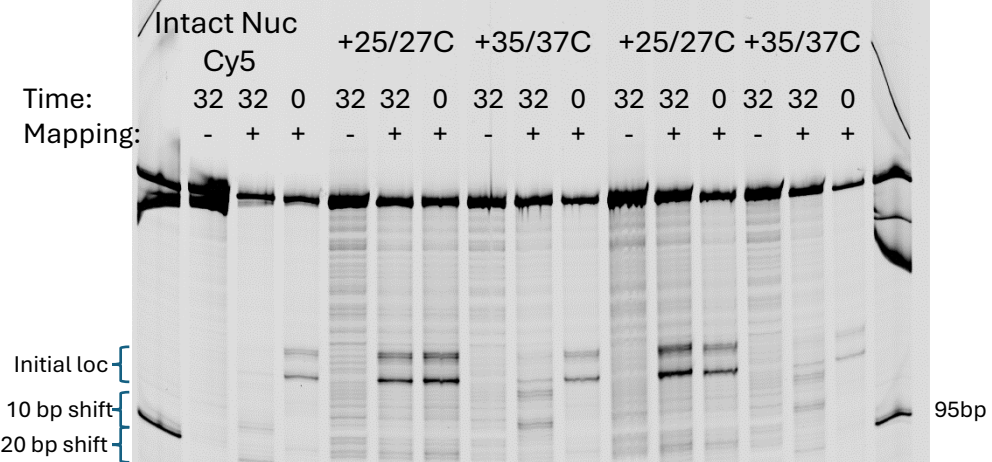



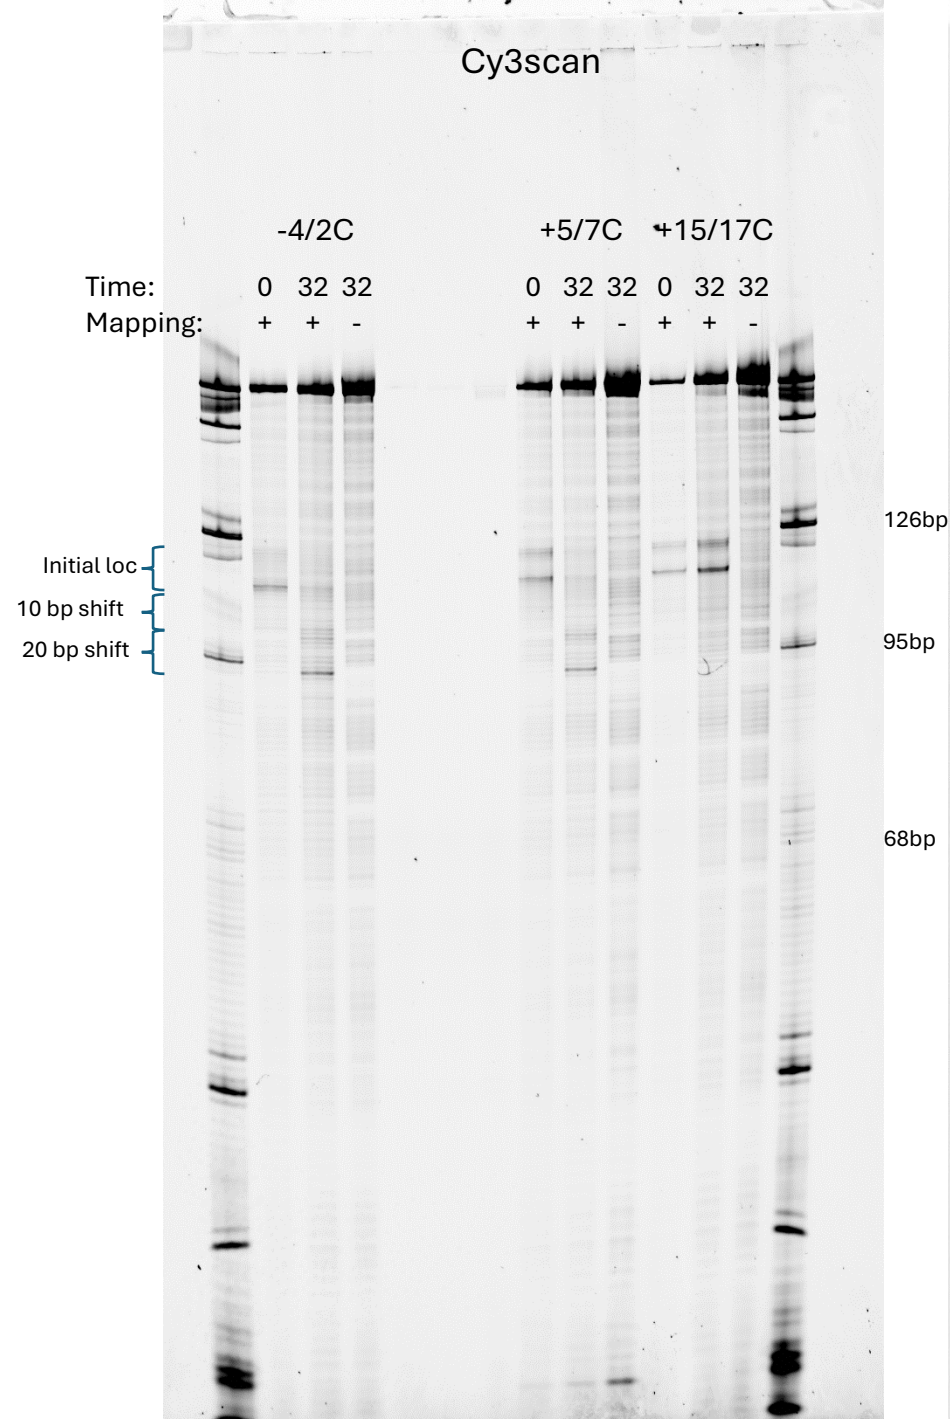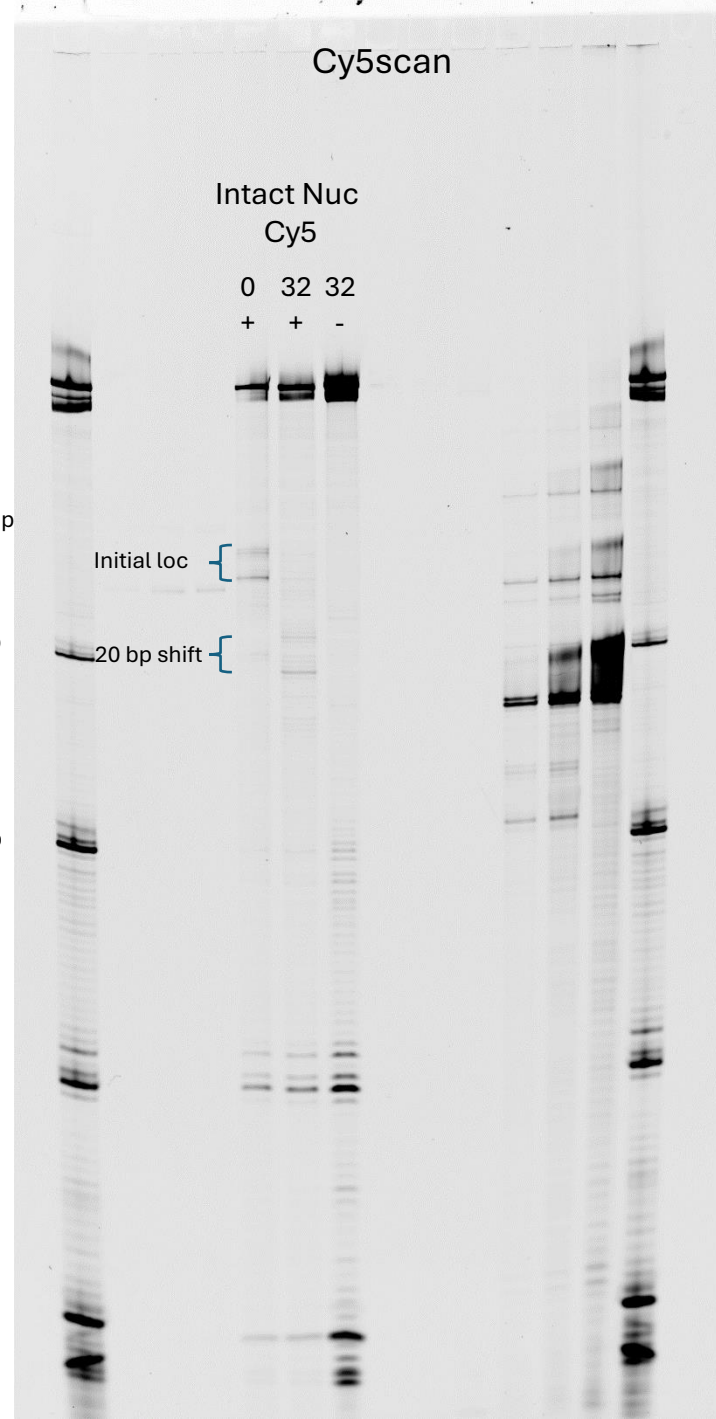

# Cy3scan

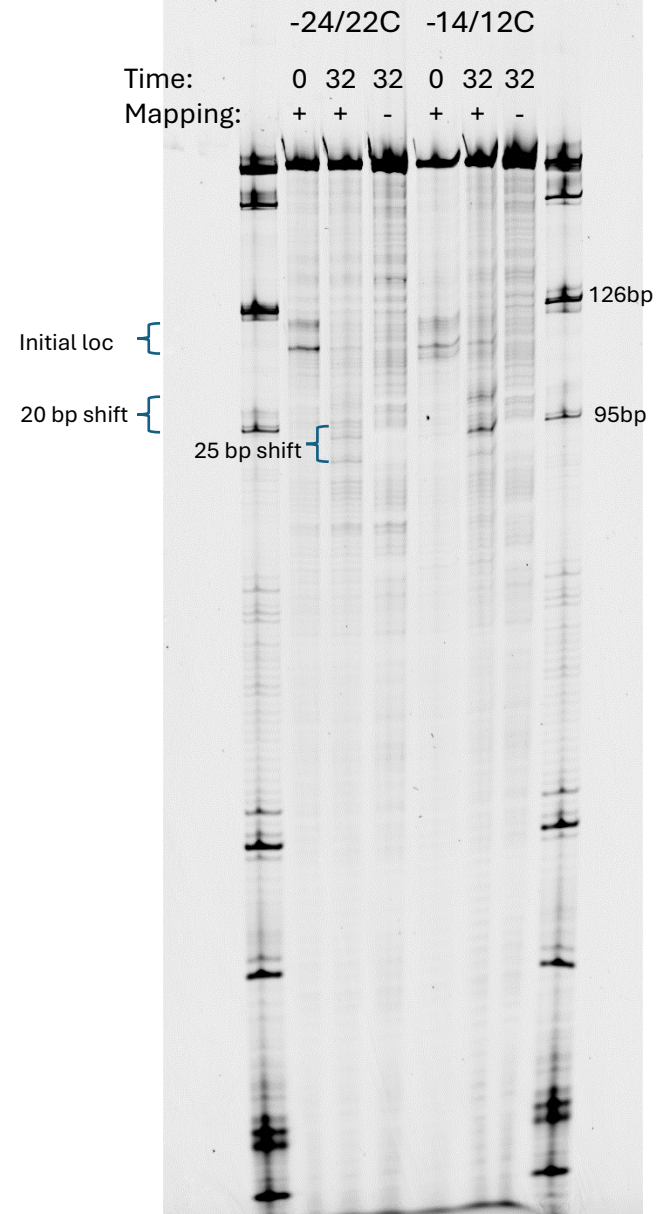

Supplement: supp [file Figure1-source_data-labelled.pdf › Figure1-source_data-labelled.pdf]

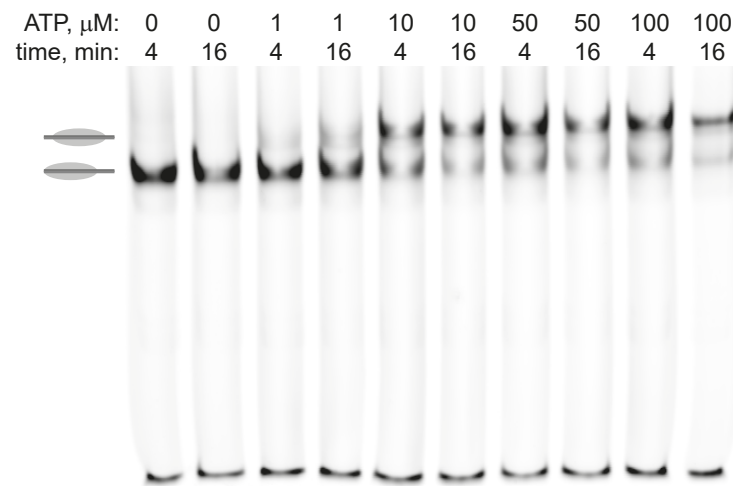

B

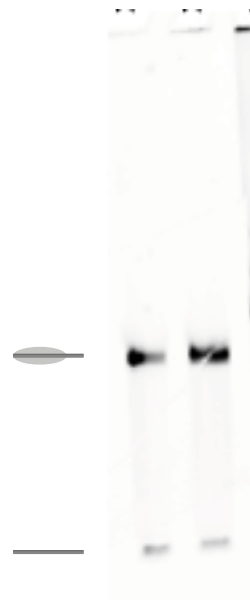

Supplement: supp [file Hughes_et_al_Figure_4_figure_supplement1.pdf › Hughes_et_al_Figure_4_figure_supplement1.pdf]

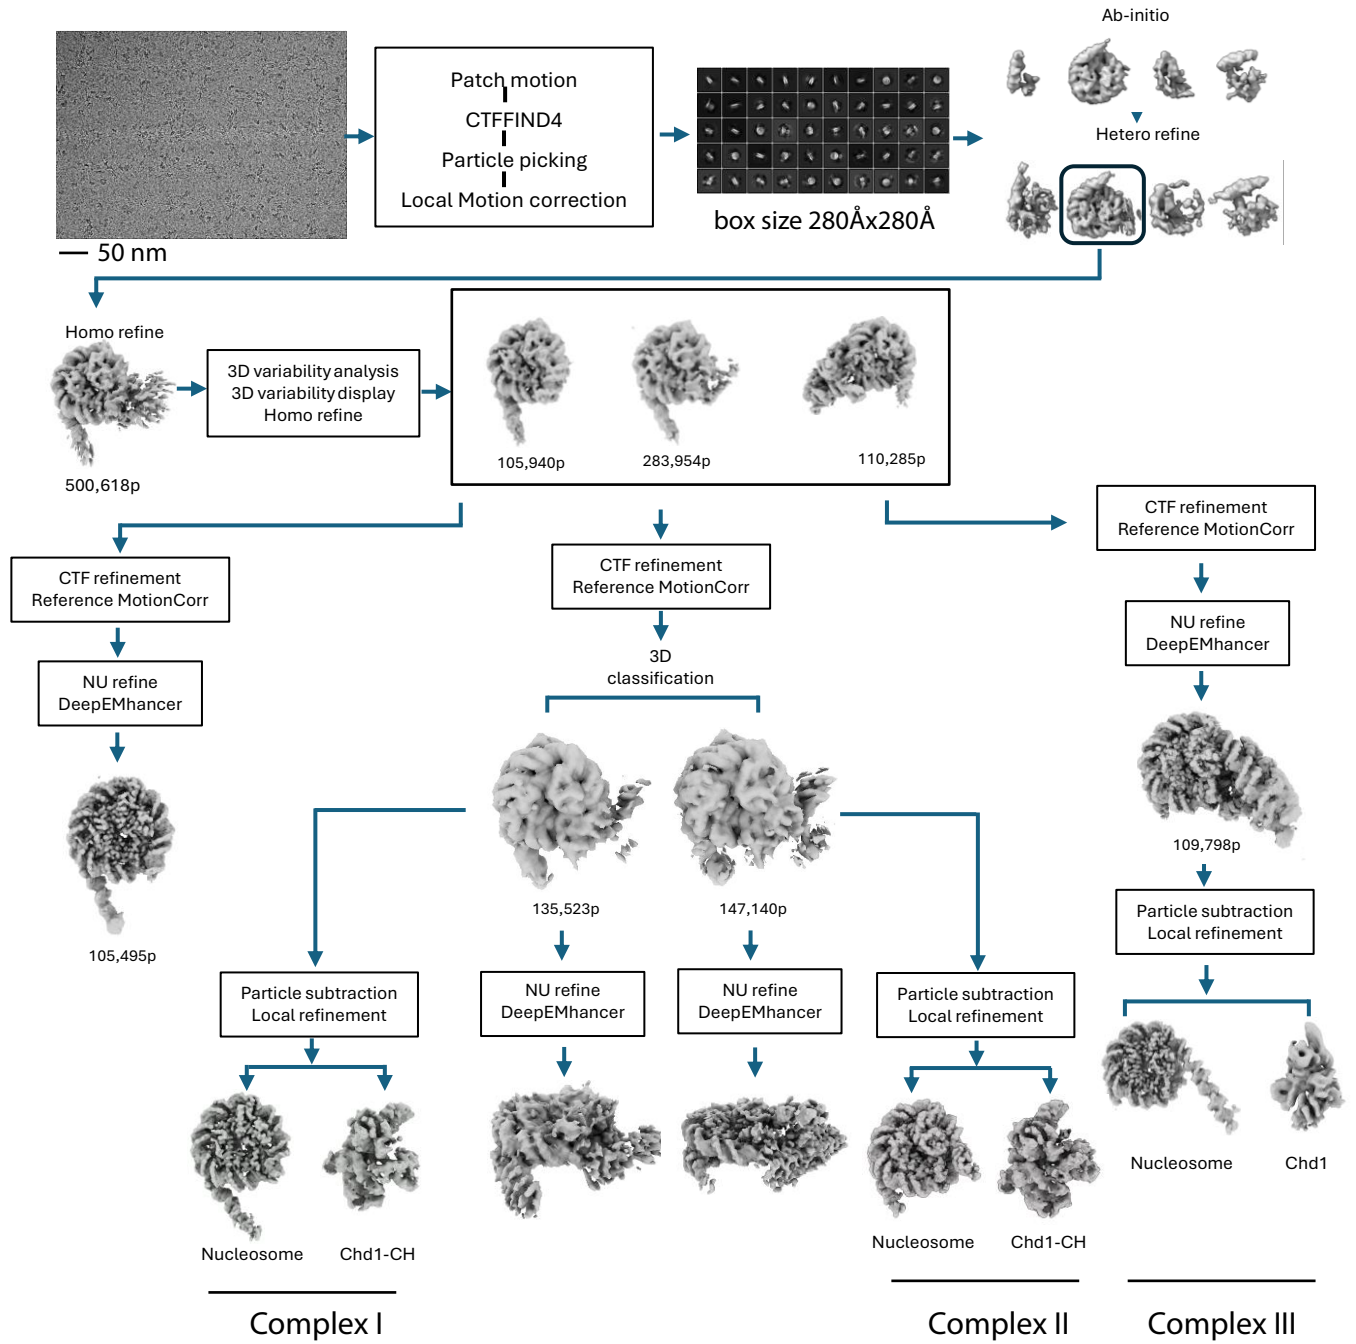

Supplement: supp [file elife_poa_e52513_Figure_3_figure_supplement_1.pdf › elife_poa_e52513_Figure_3_figure_supplement_1.pdf]

## Nucleosome

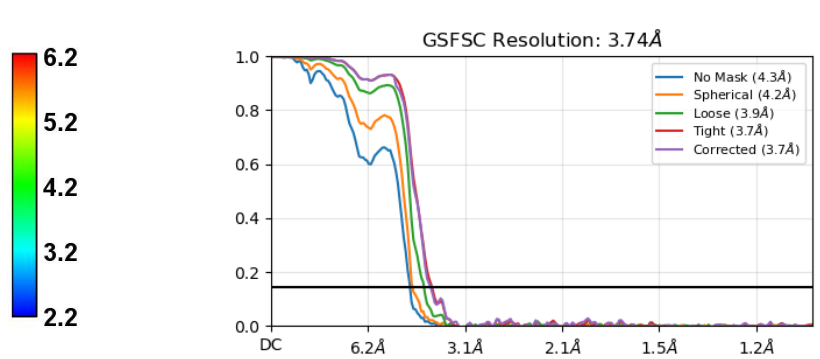

## Complex I

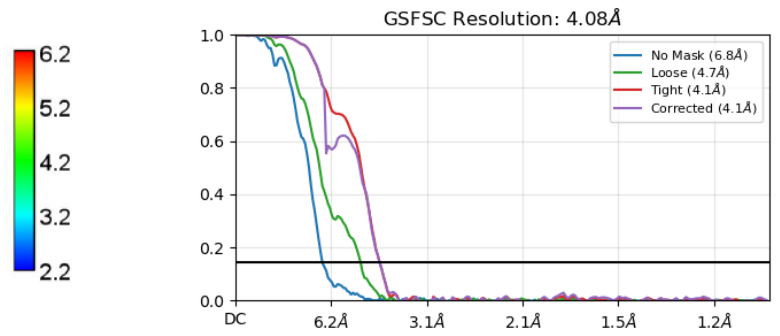

## Complex II

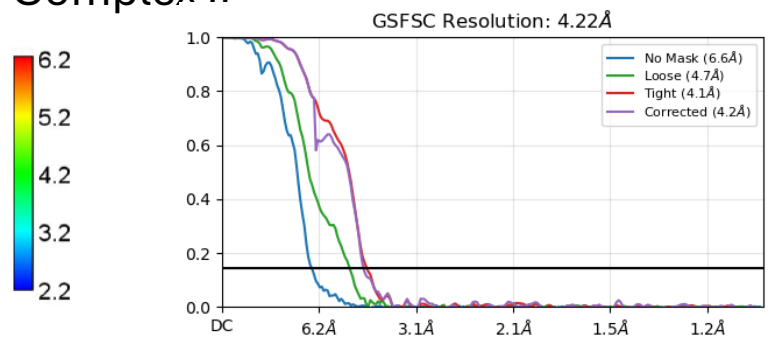

## Complex III

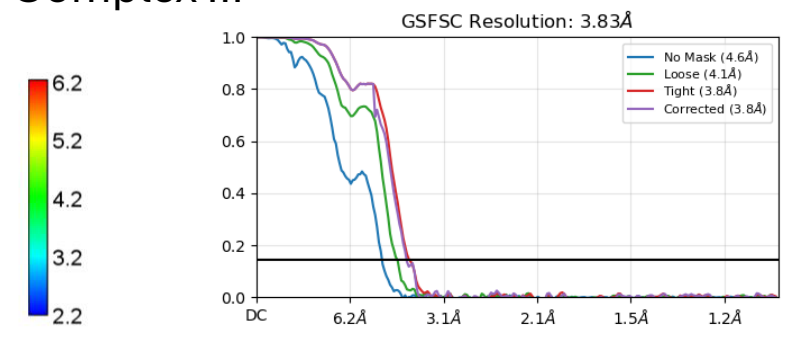

Supplement: supp [file elife_poa_e52513_Figure_3_figure_supplement_2.pdf › elife_poa_e52513_Figure_3_figure_supplement_2.pdf]

Figure 3 figure supplement 3 Exit DNA during Chd1 remodelling follows progressive unwrapping

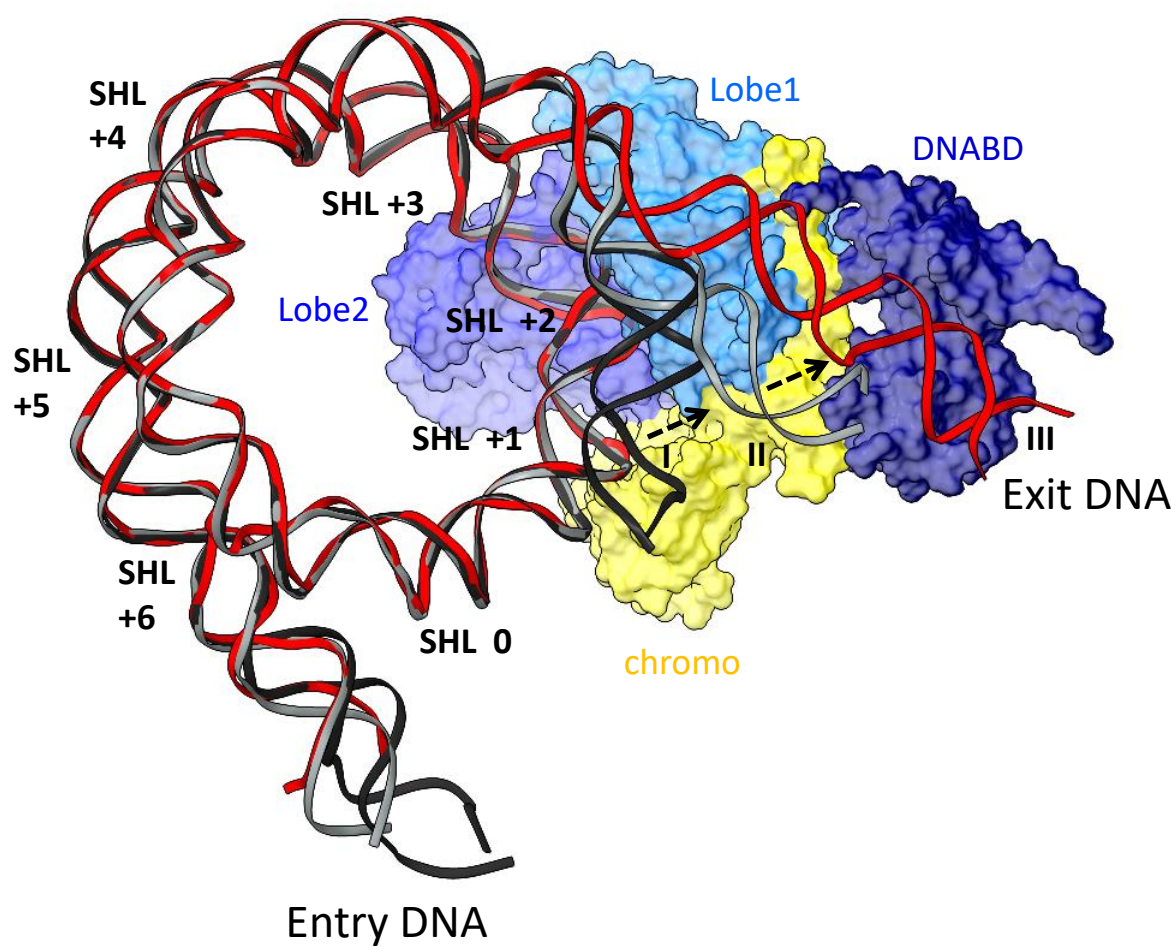

Supplement: supp [file elife_poa_e52513_Figure_3_figure_supplement_3.pdf › elife_poa_e52513_Figure_3_figure_supplement_3.pdf]
